# Supplementary material for: Asthma and risk of non-respiratory tract infection: a population-based case–control study
Source: PubMed Central journal article supplement — BMJ Open. 2013 Oct 1;3(10):e003857. doi: 10.1136/bmjopen-2013-003857 (PMC3796274; doi:10.1136/bmjopen-2013-003857), 2013-10-01
Supplement: bmjopen-2013-003857.draft_revisions.pdf [file bmjopen-2013-003857.draft_revisions.pdf]

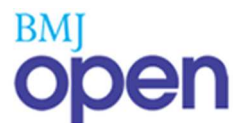

## Asthma and Risk of Non-Respiratory Tract Infection: A Population-Based Case Control Study

|                                 |                                                                                                                                                                                                                                                                                                                                                                                                  |
|---------------------------------|--------------------------------------------------------------------------------------------------------------------------------------------------------------------------------------------------------------------------------------------------------------------------------------------------------------------------------------------------------------------------------------------------|
| Journal:                        | <i>BMJ Open</i>                                                                                                                                                                                                                                                                                                                                                                                  |
| Manuscript ID:                  | bmjopen-2013-003857                                                                                                                                                                                                                                                                                                                                                                              |
| Article Type:                   | Research                                                                                                                                                                                                                                                                                                                                                                                         |
| Date Submitted by the Author:   | 21-Aug-2013                                                                                                                                                                                                                                                                                                                                                                                      |
| Complete List of Authors:       | Juhn, Young; Mayo Clinic, Community Pediatrics and Adolescent Medicine<br>Bang, Duk; Mayo Clinic,<br>Yang, Hyeon; Soon Chun Hyang University Hospital,<br>Ryoo, Eell; Gil Hospital - Gachon University,<br>Al-Hasan, Majdi; University of Kentucky Medical Center,<br>Lahr, Brian; Mayo Clinic,<br>Baddour, Larry; Mayo Clinic,<br>Yawn, Barbara; Olmsted Medical Center, Department of Research |
| <b>Primary Subject Heading</b>: | Epidemiology                                                                                                                                                                                                                                                                                                                                                                                     |
| Secondary Subject Heading:      | Epidemiology                                                                                                                                                                                                                                                                                                                                                                                     |
| Keywords:                       | Asthma < THORACIC MEDICINE, EPIDEMIOLOGY, Gastrointestinal infections < GASTROENTEROLOGY                                                                                                                                                                                                                                                                                                         |
|                                 |                                                                                                                                                                                                                                                                                                                                                                                                  |

SCHOLARONE™  
Manuscripts

1 DW Bang et al

2  
3 1 TITLE PAGE

4  
5 2 Original Article

6  
7 3 **Asthma and Risk of Non-Respiratory Tract Infection: A Population-Based Case Control**

8  
9 4 **Study**

10  
11 5  
12  
13 6 Duk Won Bang, MD<sup>a,b</sup>, Hyeon J. Yang, MD<sup>c</sup>, Eell Ryoo, MD<sup>a,d</sup>, Majdi N. Al-Hasan, MD<sup>e</sup>,

14  
15 7 Brian Lahr, MS,<sup>f</sup> Larry M. Baddour, MD<sup>g</sup>, Barbara P. Yawn, MD<sup>h</sup>, and Young J. Juhn, MD<sup>a,i</sup>

16  
17 8

18  
19 9 <sup>a</sup>Department of Pediatric and Adolescent Medicine, Mayo Clinic, Rochester, MN

20  
21 10 <sup>b</sup>Department of Internal Medicine, Soonchunhyang University Hospital, Seoul, South Korea

22  
23 11 <sup>c</sup>Department of Pediatrics, Soonchunhyang University Hospital, Seoul, South Korea

24  
25 12 <sup>d</sup>Department of Pediatrics, Gil Hospital, Gachon University School of Medicine, Incheon, South

26  
27 13 Korea

28  
29 14 <sup>e</sup>Department of Medicine, University of Kentucky Medical Center, Lexington, KY

30  
31 15 <sup>f</sup>Division of Biomedical Statistics and Informatics, Mayo Clinic, Rochester, MN

32  
33 16 <sup>g</sup>Department of Medicine, Mayo Clinic, Rochester, MN

34  
35 17 <sup>h</sup>Department of Research, Olmsted Medical Center, Rochester, MN

36  
37 18 <sup>i</sup>Department of Internal Medicine, Mayo Clinic, Rochester, MN

38  
39 19 **Corresponding author**

40  
41 20 Young J. Juhn, M.D., M.P.H

42  
43 21 Division of Community Pediatric and Adolescent Medicine

44  
45 22 Department of Pediatric and Adolescent Medicine/Internal Medicine

46  
47 23 Mayo Clinic

1 DW Bang et al

2  
3 24 200 1<sup>st</sup> Street SW

4  
5 25 Rochester, MN 55905

6  
7 26 TEL: 507-538-1642

8  
9 27 FAX: 507-284-9744

10  
11 28 E-mail: juhn.young@mayo.edu

12  
13  
14 29

15  
16  
17 30 Funding: This work was supported by the Clinician Scholarly Award from the Mayo foundation  
18 31 and a grant from the National Institute of Allergy and Infectious Diseases (R21 AI101277). It  
19 32 was also supported by the Rochester Epidemiology Project (R01-AG34676) from the National  
20 33 Institute on Aging.

21  
22  
23  
24 34

25 35 Conflict of interest: The study investigators have nothing to disclose that poses a conflict of  
26 36 interest.

27  
28  
29 37

30 38 We reviewed the STROBE statement and addressed all items in that checklist and are  
31 39 submitting the STROBE statement with the revised manuscript.

32  
33  
34 40

35 41 Key Words: Asthma, Risk, Epidemiology, Community-acquired infections, *Escherichia Coli*,  
36 42 Blood stream infection, genitourinary, and gastrointestinal tract

37 43 Abbreviations: BSI: blood stream infection, *E.Coli*: *Escherichia Coli*, TLR : Toll-like Receptor,

38 44 ICS : inhaled corticosteroid, PPV23: 23-valent pneumococcal polysaccharide vaccine

39 45 Word count: 2993

DW Bang et al

46 Article summary

47 1. Article focus: We addressed the following question in this study.

48 - Given the association between asthma and airway-related infection, is asthma also associated  
49 with non-airway-related serious infections such as *Escherichia coli* blood stream infection?

50 2. Key messages

51 - Individuals with asthma are at a significantly increased risk of non-airway-related infection,  
52 including community-acquired *E. coli* blood stream infection.

53 - The impact of asthma on risks of microbial infections may go beyond airways.

54 - Clinicians and patients should be aware of the association and recognize the risk of subsequent  
55 infection.

56 3. Strength and limitations

57 - This is the first population-based case-control study using predetermined criteria for asthma  
58 status and community-acquired *Escherichia coli* blood stream infection.

59 - The main limitation of the study is inherent limitations as a retrospective study and the study  
60 subjects were predominantly white.

62 Contributors

63 BDW collected data, interpreted the results, and drafted the manuscript; HJY participated in the  
64 study design, interpreted the results and reviewed the manuscript; ER collected data, interpreted  
65 the results, and reviewed manuscript; MNA assembled the original dataset for the *E. coli* BSI  
66 study, collected the original data, interpreted the results, and reviewed the manuscript; LMB  
67 participated in the study design, interpreted the results, and reviewed the manuscript; BPY  
68 participated in the study design, interpreted the results, and reviewed manuscript; and YJJ

DW Bang et al

1  
2  
3 69 participated in the study design, performed data analysis, interpreted the results, and drafted the  
4  
5 70 manuscript. BDW, ER, and YJJ had full access to data. All authors reviewed and approved the  
6  
7  
8 71 paper.  
9

10 72 There will be no additional data available.  
11  
12  
13 73  
14  
15 74  
16  
17 75  
18  
19 76  
20  
21 77  
22  
23 78  
24  
25 79  
26  
27 80  
28  
29 81  
30  
31 82  
32  
33 83  
34  
35 84  
36  
37 85  
38  
39 86  
40  
41 87  
42  
43 88  
44  
45 89  
46  
47 90  
48  
49 91  
50  
51  
52  
53  
54  
55  
56  
57  
58  
59  
60

For peer review only

DW Bang et al

92 **Abstract:**

93 Background: Asthmatics have increased risks of airway-related infections. Little is known about  
94 whether this is true for non-airway-related serious infections such as *Escherichia coli* blood  
95 stream infection (BSI). We assessed whether asthma is associated with a risk of developing  
96 community-acquired *E. coli* BSI.

97 Methods: The study was designed as a population-based retrospective case-control study, which  
98 included 259 eligible community-acquired *E. coli* BSI cases in Olmsted County, MN between  
99 1998 and 2007 and 259 birthday-, gender-, and residency-matched controls. Only community-  
100 acquired *E. coli* BSI cases were included. Asthma status was ascertained by predetermined  
101 criteria. An adjusted odds ratio (OR) and 95% confidence interval (CI) for the association  
102 between asthma and risk of community-acquired *E. coli* BSI was calculated using conditional  
103 logistic regression.

104 Results: Of 259 eligible cases, 179 (69 %) were female and mean age was 61±22 years. Thirty-  
105 seven of 259 cases (14%) and 16 of 259 controls (6%) had a prior history of asthma (adjusted  
106 OR: 2.74; 95% CI: 1.11-6.76; p=0.029). The population attributable risk of asthma for  
107 community-acquired *E. coli* BSI was 9%. Although not statistically significant, there was a  
108 borderline association between having a history of food allergy and increased risk of community-  
109 acquired *E. coli* BSI (6% vs 2%; adjusted OR: 3.51; 95% CI: 0.94-13.11, p=0.062).

110 Conclusions: Based on the findings of the current population-based, case-control investigation, a  
111 history of asthma may be associated with risk of community-acquired *E. coli* BSI. The impact of  
112 asthma on risk of microbial infections may go beyond airways.

113

114 **Abstract Word Count:** 246

DW Bang et al

## 115 INTRODUCTION

116 Asthma is the most common chronic illness in childhood and is a major cause of  
117 morbidity in adults, affecting 4-17% of children and 7.7% of adults in the US.(1-3)] About 300  
118 million people globally are estimated to be affected by asthma.(4)

119 Previous studies showed increased risks of microbial infections among individuals with  
120 asthma(5-10) and the population attributable risk for asthma of serious pneumococcal disease  
121 was 11-17%.(6, 10) Impaired innate and adaptive immune functions among asthmatics have  
122 been suggested for potential underlying mechanisms.(11-18) These study results are based on  
123 microbial infections of the airways. However, little is known about whether asthma status is  
124 associated with risk of non-airway-related bacterial infections such as community-acquired  
125 *Escherichia coli* blood stream infection (BSI).

126 Addressing this question should provide an important insight into the nature of the impact  
127 of asthma status on susceptibility to microbial infection. Specifically, it will improve our  
128 understanding on whether the impact of asthma status on susceptibility to infection goes beyond  
129 airways. In investigating this question, community-acquired *E. coli* BSI is suitable because it is  
130 not an airway-related infection but genitourinary tract/gastrointestinal origin, *E. coli* is a gram-  
131 negative bacterium with Toll-like Receptor (TLR)-4-mediated signal transduction for innate  
132 immunity, and *E. coli* is the most common cause of community-acquired BSI.(19) Up to 30% of  
133 individuals who developed community-acquired *E. coli* BSI did not have known risk  
134 factors,[(20)] suggesting that unrecognized risk factors exist that are associated with the  
135 development of community-acquired *E. coli* BSI.

136 Investigating the relationship between asthma and non-airway-related serious bacterial  
137 infections will advance our understanding on the extent to which asthma impacts susceptibility to

DW Bang et al

1  
2  
3 138 microbial infections and whether asthma could be an unrecognized risk factor for non-airway-  
4  
5 139 related bacterial infections.  
6  
7

8 140 We hypothesize that individuals with asthma have an increased risk of community-  
9  
10 141 acquired *E. coli* BSI, as compared to those without asthma. To test this hypothesis, we conducted  
11  
12 142 a population-based retrospective case-control study.  
13  
14

15 143

16  
17 144

18  
19 145

20  
21 146

22  
23 147

24  
25 148

26  
27 149

28  
29 150

30  
31 151

32  
33 152

34  
35 153

36  
37 154

38  
39 155

40  
41 156

42  
43 157

44  
45 158

46  
47 159

48  
49 160

50  
51  
52  
53  
54  
55  
56  
57  
58  
59  
60



DW Bang et al

1  
2  
3 161 **METHODS**  
4

5 162 The study was approved by the Institutional Review Boards of both Mayo Clinic and  
6  
7 163 Olmsted Medical Center. This study was designed as a population-based case-control study.  
8  
9

10 164 **Study population and setting**  
11

12 165 Olmsted County, Minnesota is an excellent setting to conduct a population-based  
13  
14 166 epidemiologic study such as this because medical care is virtually self-contained within the  
15  
16 167 community (nearly all Olmsted County residents receive medical cares from two medical centers  
17  
18 168 in the community). The population characteristics of Olmsted County residents are similar to  
19  
20 169 those of non-Hispanic white.(21) If one grants the authorization for using medical record for  
21  
22 170 research (almost 95% of Olmsted County residents), each patient is assigned a unique identifier  
23  
24 171 under the auspices of the Rochester Epidemiology Project (REP).(22) Using REP resources, we  
25  
26 172 previously demonstrated that incidence rates of asthma for this community are similar to other  
27  
28 173 communities. The annual incidence rate of asthma in Rochester was 238 cases per 100,000  
29  
30 174 persons, which is comparable to those in other communities such as Tecumseh, Michigan  
31  
32 175 (250/100,000).(23)  
33  
34  
35  
36  
37  
38

39 176 **Study subjects: Case ascertainment**  
40

41 177 To test our study hypothesis, we utilized a population-based incidence parent study,  
42  
43 178 which previously identified the community-acquired cases to study antimicrobial resistance  
44  
45 179 trends of *E. coli* BSI in the community. Details of the case ascertainment have been described  
46  
47 180 previously.(19) Briefly, using the microbiology databases at Mayo Clinic Rochester and Olmsted  
48  
49 181 Medical Center, all eligible children and adults with monomicrobial *E. coli* BSI (n=274) among  
50  
51 182 Olmsted County residents from January 1, 1998 to December 31, 2007 (i.e., a population-based  
52  
53 183 all incident cases of *E. coli* BSI ) were identified based on the criteria suggested by Freidman et  
54  
55  
56  
57  
58  
59  
60

DW Bang et al

1  
2  
3 184 al.(24) As *E. coli* BSI is required for inpatient parental treatment, community-acquired *E. coli*  
4  
5 185 BSI was defined by isolation of *E. coli* from blood cultures at the time of hospital admission or  
6  
7  
8 186 within 48 hours after hospital admission for patients who did not fit criteria for health care–  
9  
10 187 associated infection according to the Freidman’s criteria.(24) Medical records of all subjects  
11  
12 188 were reviewed by investigators of the previous study (MNA) to confirm the diagnosis of  
13  
14 189 community-acquired *E. coli* BSI, assess clinical features, and determine the eligibility. Only  
15  
16 190 community-acquired *E. coli* BSI was included because nosocomial and health care-associated *E.*  
17  
18 191 *coli* BSI are unsuitable to address the aim of the present study (clinically, they are a high-risk  
19  
20 192 population for *E. coli* BSI and not representative of the study population). The index date of BSI  
21  
22 193 was defined as the date when blood cultures that eventually grew *E. coli* were obtained.  
23  
24  
25 194 Exclusion criteria for cases (and controls) included: 1) polymicrobial BSI caused by more than  
26  
27 195 one microorganism, 2) blood cultures acquired at autopsy, 3) nosocomial and health care-  
28  
29 196 associated *E. coli* BSI, 4) non-Olmsted County residency at the time of index date of BSI, 5) no  
30  
31 197 research authorization for using medical record for research, and 6) health conditions making  
32  
33 198 ascertainment of asthma difficult listed in Table 1.

### 199 **Selection of control subjects**

40  
41 200 Control subjects were randomly selected with 1:1 matching from Olmsted County  
42  
43 201 residents who had not had a history of *E. coli* BSI at the end of the study period. Briefly, a list of  
44  
45 202 potential control subjects who had received medical care from either Mayo Clinic or Olmsted  
46  
47 203 Medical Center and who met the matching criteria was generated and randomly selected from the  
48  
49 204 REP database for the present study. The matching criteria included: 1) gender, 2) birth date  
50  
51 205 (within six months for those <18 years of age and within one year for those > 18 years of age), 3)  
52  
53 206 the same clinic registration year as matched case (within one year), and 4) closest clinic visit to  
54  
55  
56  
57  
58  
59  
60

DW Bang et al

1  
2  
3 207 index date of matched case within one year. The index date for control subjects was defined as  
4  
5 208 the closest (within one year) clinic visit date to index date of BSI for their corresponding  
6  
7  
8 209 matched case. Based on the number of cases and controls enrolled in this present study (259  
9  
10 210 pair), assuming 8% of asthma prevalence among controls, this present study had 80% power to  
11  
12 211 detect an effect size of 2.27 of odds ratio (16.5% of asthma in cases). This effect size was  
13  
14 212 smaller than the reported effect sizes for the association between asthma and risk of microbial  
15  
16 213 infection (OR: 2.4-6.7) suggesting adequate statistical power to address the study aim.(6, 10)  
17  
18  
19

#### 20 214 **Exposure ascertainment (asthma status)**

21  
22 215 For determining asthma status of all cases and controls, we conducted comprehensive  
23  
24 216 medical record reviews to apply predetermined criteria for asthma as performed in our previous  
25  
26 217 work.(5, 6) The criteria are delineated in Table 1. These criteria have been extensively used in  
27  
28 218 research for asthma epidemiology and were found to have high reliability.(25-30) We included  
29  
30 219 both definite and probable asthma according to the criteria prior to the index date of BSI cases  
31  
32 220 because most probable asthmatics become definite over time.(6, 31) The incidence dates (the  
33  
34 221 first date when one met the criteria for asthma) for all asthmatic patients were determined; thus,  
35  
36 222 we were able to discern the temporal relationship between asthma status (exposure) and *E coli*  
37  
38 223 BSI (outcome). The risk of *E. coli* BSI was assessed in relation to the current asthma status(32):  
39  
40 224 remission (no asthma symptoms, no asthma-related visits, or no asthma medications for at least  
41  
42 225 three years prior to index date); active or current asthma (presence of clinical symptoms, asthma-  
43  
44 226 related visits, or asthma medications within one year prior to index date); and inactive (not  
45  
46 227 current) asthma (presence of asthma symptoms, asthma-related visits, or asthma medications  
47  
48 228 within 1-3 years prior to index date).  
49  
50  
51  
52  
53  
54

#### 55 229 **Other variables**

DW Bang et al

1  
2  
3 230 Pertinent covariates and confounders were collected from medical records:  
4  
5 231 sociodemographic variables (age, gender, ethnicity, and educational status), asthma medications  
6  
7 232 including inhaled and systemic corticosteroids, family history of asthma, atopic status based on  
8  
9 233 sensitization against aeroallergens and food allergens, smoking status (either active or passive  
10  
11 234 exposure to tobacco smoke), vaccination status, and co-morbid conditions at the time of index  
12  
13 235 date as listed in Table 2. The period of data collection was from October 1, 2011 to May 30,  
14  
15 236 2012.

16  
17  
18  
19  
20 237 **Statistical analysis**

21  
22 238 Formal comparison of asthma and other suspected risk factors between matched cases  
23  
24 239 and controls was performed using conditional logistic regression, with community-acquired *E.*  
25  
26 240 *coli* BSI as the target of prediction. All factors were analyzed for a univariate association with  
27  
28 241 BSI, and any variables meeting the Greenland entry criteria ( $P < 0.2$ ) were carried forward into a  
29  
30 242 final multivariable model.(33)] Odds ratios (OR) from univariate (unadjusted) and multivariable  
31  
32 243 (adjusted) models are reported to express the magnitude of association in terms of the likelihood  
33  
34 244 of being a case. We calculated the population attributable risk percentage (PAR%) of asthma for  
35  
36 245 community-acquired *E. coli* BSI using the formula established by Miettinen.(34) Statistical  
37  
38 246 significance was tested at a two-sided alpha error of 0.05. All analyses were carried out with the  
39  
40 247 statistical software package SAS, version 9.2 (SAS Institute, Cary, NC, USA).  
41  
42  
43  
44  
45  
46  
47  
48  
49  
50  
51  
52  
53  
54  
55  
56  
57  
58  
59  
60

DW Bang et al

## 253 RESULTS

### 254 Study subjects

255 Of the 274 patients who were identified in the original study, 259 were eligible for the present  
256 study. Fifteen patients were excluded; five for consistent FEV1 < 50%, two for restrictive lung  
257 disease, two for significant kyphoscoliosis, two for bronchiectasis, one for cystic fibrosis, one for  
258 pulmonary fibrosis, and two due to non-Olmsted County residency. Of the eligible 259 cases,  
259 179 (69%) were female, 249 (96%) were 18 years of age or older (age mean±standard deviation,  
260 61±22 years), and 222 (86%) were Caucasian. The characteristics of the cases and their matched  
261 controls, and the individual associations with community-acquired *E. coli* BSI, are summarized  
262 in Table 2. There were only 10 asthmatics on moderate- or high-dose inhaled corticosteroid (ICS)  
263 and two asthmatics on systemic corticosteroid at the time of the index date. Comparing subjects  
264 with asthma versus those without, there was no significant difference in the proportions, who had  
265 received influenza vaccine (40% vs. 40%, p=0.99) or PPV23 (49% vs. 44%, p=0.49) within one  
266 year prior to index date.

### 267 Association between asthma and risk of community-acquired *E. coli* BSI

268 Thirty-seven of 259 (14%) cases had a history of asthma prior to the index date of community-  
269 acquired *E. coli* BSI, compared with 16 of 259 (6%) controls (unadjusted OR: 2.75; 95% CI:  
270 1.42-5.32; p=0.003). Of the 37 case subjects with asthma, 33 (89%) had definite asthma and 4  
271 (11%) had probable asthma. Of the 16 controls with asthma, 12 (75%) had definite asthma and 4  
272 (25%) had probable asthma. Among all 53 asthmatics, 18 were on ICS therapy at the index date  
273 (8 on low-dose ICS and 10 on moderate to high-dose ICS therapy). The effect of asthma on risk  
274 of community-acquired *E. coli* BSI, independent of other risk factors, is summarized in Table 3.  
275 Subjects with a history of asthma by predetermined criteria for asthma in Table 1 had a nearly 3-

DW Bang et al

1  
2  
3 276 fold higher risk of developing community-acquired *E. coli* BSI compared to those without  
4  
5  
6 277 asthma, controlling for all potential confounding factors (adjusted OR: 2.74; 95% CI: 1.11-6.76;  
7  
8 278  $p=0.029$ ). The PAR% of asthma by predetermined criteria for asthma in Table 1 for the risk of *E.*  
9  
10 279 *coli* BSI was 9%. The  $p$ -values for testing a significant interaction between asthma and  
11  
12 280 categorized age were as follows:  $p=0.285$  for age cutoff of 65 years (i.e.,  $\geq 65$  vs.  $<65$  years),  
13  
14 281  $p=0.958$  for age cutoff of 40 years (i.e.,  $\geq 40$  vs.  $<40$  years), and  $p=0.417$  for age cutoffs of 40  
15  
16  
17 282 years and 65 years (i.e.,  $<40$ , 40-65, vs.  $>65$  years). As a result, we have no evidence of a  
18  
19  
20 283 differential asthma effect across age strata. Additional characteristics of asthma were also  
21  
22 284 evaluated for an association with risk of community-acquired *E. coli* BSI (see Table 4). Adjusted  
23  
24 285 for other factors, active asthma was associated with increased risk of *E. coli* BSI but for  
25  
26  
27 286 asthmatics on ICS therapy compared to non-asthmatics, but the overall 3-level effect was not  
28  
29 287 statistically significant ( $p=0.079$ ).

### 288 **Other variables and *E. coli* BSI**

33  
34 289 Several of the high-risk conditions, as well as non-Caucasian ethnicity, were independently  
35  
36 290 associated with increased risk of community-acquired *E. coli* BSI (see Tables 2 and 3). A history  
37  
38 291 of food allergy was found in 16 (6%) of 259 cases as compared with 6 (2%) of 259 controls  
39  
40  
41 292 (adjusted OR: 3.51; 95% CI: 0.94-13.11;  $p=0.062$ ). Neither allergic rhinitis ( $p=0.82$ ) nor atopic  
42  
43 293 dermatitis ( $p=0.87$ ) was found to be significantly associated with community-acquired *E. coli*  
44  
45 294 BSI.

47  
48 295

49  
50 296

51  
52 297

53  
54 298

DW Bang et al

299

## 300 DISCUSSION

301 To our knowledge, this is the first population-based, case-control study that demonstrated an  
302 association between asthma and risk of non-respiratory bacterial infection such as community-  
303 acquired *E. coli* BSI. This association was independent of other risk factors including age,  
304 gender, follow-up duration, ethnicity, educational level, and comorbid conditions (adjusted OR:  
305 2.74; 95% CI: 1.11-6.76;  $p=0.029$ ). Analyses by different age cut-offs showed that the results  
306 were not affected by age effect (e.g., younger vs. older than 40 years of age). Given either the  
307 previously-reported non association (hazard ratio, HR: 1.29, 95%CI: 0.53-3.12) or a protective  
308 effect (HR: 0.52, 95%CI:0.36-0.76) of ICS therapy on risk of pneumonia in asthmatics(35) and a  
309 small number of asthmatics with moderate or high-dose ICS in our study (10 of 53, 19%), we  
310 suspect that active or current asthma (or collectively those given ICS therapy) might be related to  
311 risk of community-acquired *E. coli* BSI instead of ICS alone. There were only 2 asthmatics on  
312 systemic corticosteroid therapy at the time of the index date; therefore, exposure to systemic  
313 corticosteroid therapy was unlikely to account for the observed association. We believe that  
314 susceptibility bias (e.g., covariate imbalance at baseline) is unlikely to account for the association  
315 found in our study given the full adjustment for potential confounders. One concern could be  
316 detection bias stemming from a situation where exposure status (asthma status) systematically  
317 affects detection of outcomes. However, given *E. coli* BSI as a life-threatening condition, this is  
318 unlikely and also there was no significant difference in symptom duration from BSI-related  
319 symptom to index date between asthma and non-asthma in cases ( $4.7\pm 5.5$  vs  $5.2\pm 5.5$  days,  
320  $p=0.61$ ). Since detection of asthma depends on follow-up duration from registration to index  
321 date of community-acquired *E. coli* BSI, we designed our study to ensure that duration was



DW Bang et al

1  
2  
3 322 similar between cases and controls. Asthma prevalence in controls in our study was 6%, which is  
4  
5 323 similar to that in adults (7%) in the United States (5.5% for males and 9.7% for females).(36)  
6  
7  
8 324 Also, the prevalence of other common chronic condition such as coronary heart disease in our  
9  
10 325 study (15%) was similar to the national average (7.1% for adults aged 45-64 years and 19.8% for  
11  
12 326 adults aged  $\geq 65$  years) suggesting that our control group may reasonably represent a general  
13  
14 327 population of adults in the United States.(3) There were no significant differences in influenza  
15  
16 328 and PPV23 vaccination rates between cases and controls, which may imply similar access to  
17  
18 329 health care services. Also, food allergy approached to statistical significant association with risk  
19  
20 330 of *E. coli* BSI but other atopic conditions were not. This is probably due to greater  
21  
22 331 misclassification bias of ascertainment of allergic rhinitis and atopic dermatitis by ICD-9 code  
23  
24 332 compared to asthma status and food allergy by predetermined criteria in our study. Taken  
25  
26 333 together, our study results suggest that asthma status is independently associated with risk of  
27  
28 334 community-acquired *E. coli* BSI.  
29  
30  
31  
32  
33

34 335 There are only a few previous studies, which assessed the incidence of *E. coli* BSI and  
35  
36 336 risk factors associated with its development, including asthma. One study showed a higher risk  
37  
38 337 of community-acquired *E. coli* BSI in asthmatics compared to non-asthmatics among those over  
39  
40 338 65 years of age (5.5% vs. 1%).(37) However, another study showed reduced risk of *E. coli* BSI  
41  
42 339 in asthmatics (rate ratio: 0.3; 95% CI: 0.2-0.4) compared to that in total regional population.(38)  
43  
44 340 These studies have significant limitations including no *a priori* hypothesis testing on the  
45  
46 341 relationship between asthma and risk of community-acquired *E. coli* BSI, utilization of  
47  
48 342 administrative data from health care organizations or case reports, ascertainment of *E. coli* BSI  
49  
50 343 cases and asthma based on ICD-9 code, inclusion of only elderly patients aged over 65 years,(37)  
51  
52 344 and no concurrent control group.(38) Thus, our study is the first population-based case-control  
53  
54  
55  
56  
57  
58  
59  
60



DW Bang et al

1  
2  
3 345 study that demonstrated a relationship between asthma and risk of community-acquired *E. coli*  
4  
5 346 BSI. Several studies showed increased risks of microbial infections in asthmatics[(5-7, 10, 11)  
6  
7  
8 347 but these studies only addressed the relationship between asthma and airway infections.  
9

10 348 The mechanisms underlying the apparent association between asthma and risk of  
11  
12 349 community-acquired *E. coli* BSI are unknown. Whether previously reported impaired innate  
13  
14 350 immune factors that may predispose to infections due to viruses(13, 39, 40) and other bacteria  
15  
16 351 are operative in community-acquired *E. coli* BSI is undefined. Recently, Habibzay et al reported  
17  
18 352 impaired innate immunity against pneumococci through impaired TLR-receptor signal  
19  
20 353 transduction by house dust mite allergic sensitization resulting in reduced neutrophil recruitment  
21  
22 354 and increased risk of pneumococcal infection in the airways.(11) It is worth investigating  
23  
24 355 whether allergic sensitization can induce similar impairment of innate immunity through TLR-4  
25  
26 356 for gram-negative bacteria in genitourinary or gastrointestinal tracts in asthmatics. Also, an  
27  
28 357 adaptive immune response to gram-negative bacteria might be altered in asthmatics,(41) which  
29  
30 358 may affect susceptibility to gram-negative bacterial infection. For example, Koch et al reported  
31  
32 359 impaired Type 1 helper T cell (Th1) response (interleukin-12-induced interferon- $\gamma$  release from T  
33  
34 360 lymphocytes) to endotoxin from *Salmonella enteritidis* in asthmatics.(42) Further studies are  
35  
36 361 needed to address our study findings.  
37  
38  
39  
40  
41  
42

43 362 The main strengths of our study are a population-based study design and include the  
44  
45 363 epidemiologic merits of self-contained health care environment with comprehensive medical  
46  
47 364 record system for research. We identified population-based all incident community-acquired *E.*  
48  
49 365 *coli* BSI cases based on the Freidman criteria. We ascertained asthma status by applying  
50  
51 366 predetermined criteria independent of a physician diagnosis of asthma or ICD-9 code. Also, our  
52  
53 367 study has inherent limitations as a retrospective study. We could not obtain detail information on  
54  
55  
56  
57  
58  
59  
60

DW Bang et al

1  
2  
3 368 certain variables such as atopic sensitization data or smoking history (e.g., duration or the  
4  
5 369 number of cigarettes a day) but we assumed this data to be missing at random (i.e., it is subject to  
6  
7  
8 370 non-differential misclassification bias for comparison groups of interest). Although our criteria  
9  
10 371 for asthma was based on medical record review, given the absence of gold standard for asthma,  
11  
12 372 the retrospective investigation for feasibility (due to infrequent *E coli* BSI), and the extensive use  
13  
14 373 of the criteria in previous asthma research, we believe the criteria is unlikely to result in a  
15  
16 374 significant bias affecting interpretation of the results. Our study finding that asthma prevalence  
17  
18 375 among controls was similar to that at the national level should mitigate this concern. Our study  
19  
20 376 subjects were predominantly white which might limit generalizability of our results to other  
21  
22 377 ethnic groups. Our study subjects were relatively a older population affected by many comorbid  
23  
24 378 conditions which might confound the study results. However, when we examined the effect of  
25  
26 379 the interaction between age and asthma, we found that the main results on the association  
27  
28 380 between asthma and risk of *E coli* BSI did not appear to be significantly affected by various  
29  
30 381 cutoffs of age suggesting the results did not differ by age group (younger vs. older group).  
31  
32  
33  
34  
35

36 382 In conclusion, asthmatics might be at an increased risk of non-respiratory tract bacterial  
37  
38 383 infections, including community-acquired *E. coli* BSI. The mechanisms responsible for this  
39  
40 384 association are yet to be defined while additional investigations replicate our study findings.  
41  
42  
43  
44  
45

#### 46 386 **Acknowledgement**

47  
48 387 We thank the staff of the Pediatric Asthma Epidemiology Research Unit for their comments and  
49  
50 388 suggestions. We also thank Elizabeth Krusemark for administrative assistance. This work was  
51  
52 389 supported by the Clinician Scholarly Award from the Mayo foundation and by the Rochester  
53  
54 390 Epidemiology Project (R01-AG34676) from the National Institute on Aging. The sponsor of the  
55  
56  
57  
58  
59  
60

DW Bang et al

391 study had no role in study design, data collection, data analysis, data interpretation, or writing of  
392 the report.

393

394

395

396

397

398

399

400

401

402

403

404

405

406

407

408

409

410

411

412

413

DW Bang et al

414 **References**

- 415 1. Eder W, and Ege MJ, and von Mutius E. The Asthma Epidemic. *New England Journal of Medicine*. 2006;355(21 %R doi:10.1056/NEJMra054308):2226-35.
- 417 2. Barnett SB, TA. N. Costs of asthma in the United States: 2002-2007. *J Allergy Clin Immunol* 2011;127(1):145-52.
- 419 3. The Center for Disease Control and Prevention. Vital signs: asthma prevalence, disease characteristics, and self-management education --- United States, 2001--2009. *MMWR Morb Mortal Wkly Rep*. 2011;60(17):547-52. Epub 2011/05/06.
- 422 4. Bernsen RM, van der Wouden JC, Nagelkerke NJ, JC. dj. Early life circumstances and atopic disorders in childhood. *Clinical & Experimental Allergy*. 2006;36(7):858-65.
- 424 5. Capili CR, Hettinger A, Rigelman-Hedberg N, Fink L, Boyce T, Lahr B, et al. Increased risk of pertussis in patients with asthma. *J Allergy Clin Immunol*. 2012;129(4):957-63. Epub 2011/12/31.
- 427 6. Juhn YJ, Kita H, Yawn BP, Boyce TG, Yoo KH, McGree ME, et al. Increased risk of serious pneumococcal disease in patients with asthma. *Journal of Allergy and Clinical Immunology*. 2008;122(4):719-23.
- 430 7. Jung JA, Kita H, Yawn BP, Boyce TG, Yoo KH, McGree ME, et al. Increased risk of serious pneumococcal disease in patients with atopic conditions other than asthma. *J Allergy Clin Immunol*. 2010;125(1):217-21.
- 433 8. Klemets P, Lyytikainen O, Ruutu P, Ollgren J, Kaijalainen T, Leinonen M, et al. Risk of invasive pneumococcal infections among working age adults with asthma. *Thorax*. 2010;65(8):698-702. Epub 2010/08/06.
- 436 9. Pilishvili T, Zell ER, Farley MM, Schaffner W, Lynfield R, Nyquist AC, et al. Risk factors for invasive pneumococcal disease in children in the era of conjugate vaccine use. *Pediatrics*. 2010;126(1):e9-17.
- 439 10. Talbot TR, Hartert TV, Mitchel E, Halasa NB, Arbogast PG, Poehling KA, et al. Asthma as a risk factor for invasive pneumococcal disease. *N Engl J Med*. 2005;352(20):2082-90.
- 441 11. Habibzay M, Saldana JI, Goulding J, Lloyd CM, Hussell T. Altered regulation of Toll-like receptor responses impairs antibacterial immunity in the allergic lung. *Mucosal Immunol*. 2012;5(5):524-34. Epub 2012/05/03.
- 444 12. Jung J, Kita H, Nahm M, Tsigrelis C, Baddour L, Jacobson R, et al. Influence of asthma status on serotype specific antibody pneumococcal antibody levels. *Postgraduate Medicine*. 2010;122(5):116-24.
- 447 13. Contoli M, Message SD, Laza-Stanca V, Edwards MR, Wark PA, Bartlett NW, et al. Role of deficient type III interferon-lambda production in asthma exacerbations. *Nat Med*. 2006;12(9):1023-6.
- 450 14. Wark PA, Johnston SL, Bucchieri F, Powell R, Puddicombe S, Laza-Stanca V, et al. Asthmatic bronchial epithelial cells have a deficient innate immune response to infection with rhinovirus. *Journal of Experimental Medicine*. 2005;201(6):937-47. Epub 2005/03/23.
- 453 15. Message SD, Laza-Stanca V, Mallia P, Parker HL, Zhu J, Keadze T, et al. Rhinovirus-induced lower respiratory illness is increased in asthma and related to virus load and Th1/2 cytokine and IL-10 production. *Proc Natl Acad Sci U S A*. 2008;105(36):13562-7. Epub 2008/09/05.

DW Bang et al

- 1  
2  
3 457 16. Laza-Stanca V, Message SD, Edwards MR, Parker HL, Zdrengeha MT, Kebabze T, et al.  
4 458 The Role of IL-15 Deficiency in the Pathogenesis of Virus-Induced Asthma Exacerbations.  
5 459 PLoS Pathog. 2011;7(7):e1002114.  
6 460 17. Plummeridge MJ, Armstrong L, Birchall MA, Millar AB. Reduced production of  
7 461 interleukin 12 by interferon  $\gamma$  primed alveolar macrophages from atopic asthmatic subjects.  
8 462 Thorax. 2000;55(10):842-7.  
9 463 18. Ho C-Y, Wong C-K, Ko FW-S, Chan CH-S, Ho AS-S, Hui DS-C, et al. Apoptosis and b-cell  
10 464 lymphoma-2 of peripheral blood t lymphocytes and soluble fas in patients with allergic  
11 465 asthma\*. CHEST Journal. 2002;122(5):1751-8.  
12 466 19. Al-Hasan MN, Lahr BD, Eckel-Passow JE, Baddour LM. Antimicrobial resistance  
13 467 trends of Escherichia coli bloodstream isolates: a population-based study, 1998-2007.  
14 468 Journal of Antimicrobial Chemotherapy. 2009;64(1):169-74.  
15 469 20. Cheong Hs Fau - Kang C-I, Kang Ci Fau - Kwon KT, Kwon Kt Fau - Heo ST, Heo St Fau  
16 470 - Wi YM, Wi Ym Fau - Kim ES, Kim Es Fau - Lee JS, et al. Clinical significance of healthcare-  
17 471 associated infections in community-onset Escherichia coli bacteraemia. (0305-7453  
18 472 (Print)).  
19 473 21. St. Sauver JL, Grossardt BR, Yawn BP, Melton LJ, Rocca WA. Use of a Medical Records  
20 474 Linkage System to Enumerate a Dynamic Population Over Time: The Rochester  
21 475 Epidemiology Project. American Journal of Epidemiology. 2011;173(9):1059-68.  
22 476 22. Kurland LT, Molgaard CA. The patient record in epidemiology. Sci Am.  
23 477 1981;245(4):54-63. Epub 1981/10/01.  
24 478 23. Broder I, Higgins MW, Mathews KP, Keller JB. Epidemiology of asthma and allergic  
25 479 rhinitis in a total community, Tecumseh, Michigan: III. Second survey of the community. J  
26 480 Allergy Clin Immunol. 1974;53(3):127-38.  
27 481 24. Friedman ND, Kaye KS, Stout JE, McGarry SA, Trivette SL, Briggs JP, et al. Health  
28 482 care--associated bloodstream infections in adults: a reason to change the accepted  
29 483 definition of community-acquired infections. Ann Intern Med. 2002;137(10):791-7.  
30 484 25. Yunginger JW, Reed CE, O'Connell EJ, Melton LJ, 3rd, O'Fallon WM, Silverstein MD. A  
31 485 community-based study of the epidemiology of asthma. Incidence rates, 1964-1983. Am  
32 486 Rev Respir Dis. 1992;146(4):888-94. Epub 1992/10/01.  
33 487 26. Silverstein MD, Reed CE, O'Connell EJ, Melton LJ, 3rd, O'Fallon WM, Yunginger JW.  
34 488 Long-term survival of a cohort of community residents with asthma. N Engl J Med.  
35 489 1994;331(23):1537-41. Epub 1994/12/08.  
36 490 27. Bauer BA, Reed CE, Yunginger JW, Wollan PC, Silverstein MD. Incidence and  
37 491 outcomes of asthma in the elderly. A population-based study in Rochester, Minnesota.  
38 492 Chest. 1997;111(2):303-10. Epub 1997/02/01.  
39 493 28. Juhn YJ, Qin R, Urm S, Katusic S, Vargas-Chanes D. The influence of neighborhood  
40 494 environment on the incidence of childhood asthma: a propensity score approach. J Allergy  
41 495 Clin Immunol. 2010;125(4):838-43 e2. Epub 2010/03/20.  
42 496 29. Juhn YJ, Sauver JS, Katusic S, Vargas D, Weaver A, Yunginger J. The influence of  
43 497 neighborhood environment on the incidence of childhood asthma: a multilevel approach.  
44 498 Social science & medicine. 2005;60(11):2453-64. Epub 2005/04/09.  
45 499 30. Yawn BP, Yunginger JW, Wollan PC, Reed CE, Silverstein MD, Harris AG. Allergic  
46 500 rhinitis in Rochester, Minnesota residents with asthma: frequency and impact on health  
47 501 care charges. J Allergy Clin Immunol. 1999;103(1 Pt 1):54-9. Epub 1999/01/20.

DW Bang et al

- 1  
2  
3 502 31. Yunginger J, Reed, CE, O'Connell, EJ, Melton, J, O'Fallon, WM, Silverstein, MD. A  
4 503 Community-based Study of the Epidemiology of Asthma: Incidence Rates, 1964-1983. *Am*  
5 504 *Rev Respir Dis.* 1992;146:888-94.  
6  
7 505 32. Javed A, Yoo KH, Jacobson RM, Poland GA, Juhn YJ. Characteristics of Children with  
8 506 Asthma who Achieved Remission of Asthma. *Journal of Asthma.* 2013;Epub ahead of  
9 507 print(doi:10.3109/02770903.2013.787625).  
10  
11 508 33. Greenland S. Modeling and variable selection in epidemiologic analysis. *Am J Public*  
12 509 *Health.* 1989;79:340-9.  
13 510 34. Miettinen OS. Proportion of disease caused or prevented by a given exposure, trait  
14 511 or intervention. *American Journal of Epidemiology.* 1974;99(5):325-32.  
15 512 35. O'Byrne PM, Pedersen S, Carlsson L-G, Radner F, Thoren A, Peterson S, et al. Risks of  
16 513 Pneumonia in Patients with Asthma Taking Inhaled Corticosteroids. *Am J Respir Crit Care*  
17 514 *Med.* 2011;183(5):589-95.  
18  
19 515 36. The Center for Disease Control and Prevention. Prevalence of Coronary Heart  
20 516 Disease: United States, 2006-2010. *MMWR.* 2011;60(40):1377-81.  
21 517 37. Jackson LA, Benson P, Neuzil KM, Grandjean M, Marino JL. Burden of community-  
22 518 onset *Escherichia coli* bacteremia in seniors. *J Infect Dis.* 2005;191(9):1523-9.  
23  
24 519 38. Laupland KB GD, Church DL, Ross T, Pitout JD. Incidence, Risk Factors and  
25 520 Outcomes of *Escherichia coli* Blood Stream Infections in a Large Canadian Region. *Clin*  
26 521 *Microbiol Infect.* 2008;14:1041-7.  
27  
28 522 39. Sykes A, Edwards MR, Macintyre J, Del Rosario A, Bakhsoliani E, Trujillo-Torralbo  
29 523 MB, et al. Rhinovirus 16-induced IFN-alpha and IFN-beta are deficient in bronchoalveolar  
30 524 lavage cells in asthmatic patients. *J Allergy Clin Immunol.*129(6):1506-14 e6.  
31 525 40. Wang L, Zhao L, Lv J, Yin Q, Liang X, Chu Y, et al. BLT1-dependent Alveolar  
32 526 Recruitment of CD4+CD25+ Foxp3+ Regulatory T Cells Is Important for Resolution of Acute  
33 527 Lung Injury. *Am J Respir Crit Care Med.* 2012;186(10):989-98.  
34  
35 528 41. Robinson DS. Regulatory T cells and asthma. *Clin Exp Allergy.* 2009;39(9):1314-23.  
36 529 42. Koch A, Knobloch J, Dammhayn C, Raidl M, Ruppert A, Hag H, et al. Effect of bacterial  
37 530 endotoxin LPS on expression of INF-gamma and IL-5 in T-lymphocytes from asthmatics.  
38 531 *Clin Immunol.* 2007;125(2):194-204. Epub 2007/09/22.  
39  
40 532  
41 533  
42  
43 534  
44  
45 535  
46  
47  
48 536  
49  
50 537  
51  
52 538  
53  
54  
55 539  
56  
57 540  
58  
59  
60



DW Bang et al

541 Table 1. Definition of asthma

Patients were considered to have *definite* asthma if a physician had made a diagnosis of asthma with the first two conditions and/or if each of the following three conditions were present, and they were considered to have *probable* asthma if only the first two conditions were present:

1. History of cough with wheezing, and/or dyspnea, OR history of cough and/or dyspnea plus wheezing on examination,
2. Substantial variability in symptoms from time to time or periods of weeks or more when symptoms were absent, and
3. Two or more of the following:
  - Sleep disturbance by nocturnal cough and wheeze
  - Nonsmoker (14 years or older)
  - Nasal polyps
  - Blood eosinophilia higher than 300/uL
  - Positive wheal and flare skin tests OR elevated serum IgE
  - History of hay fever or infantile eczema OR cough, dyspnea, and wheezing regularly on exposure to an antigen
  - Pulmonary function tests showing one FEV<sub>1</sub> or FVC less than 70% predicted and another with at least 20% improvement to an FEV<sub>1</sub> of higher 70% predicted OR methacholine challenge test showing 20% or greater decrease in FEV<sub>1</sub>
  - Favorable clinical response to bronchodilator (e.g., documented improvement of respiratory symptoms or FEV<sub>1</sub> in spirometry after bronchodilator therapy)

Patients were excluded from the study if any of these conditions were present:

- Tracheobronchial foreign body at or about the incidence date
- Hypogammaglobulinemia (IgG less than 2.0 mg/mL) or other immunodeficiency disorder
- Wheezing occurring only in response to anesthesia or medications
- Bullous emphysema or pulmonary fibrosis on chest radiograph
- PiZZ alpha<sub>1</sub>-antitrypsin
- Cystic fibrosis
- Other major chest disease such as juvenile kyphoscoliosis or bronchiectasis  
FVC forced vital capacity; FEV<sub>1</sub>, forced expiratory volume in 1 sec.
- Pulmonary function tests that showed FEV<sub>1</sub> to be consistently below 50% predicted or diminished diffusion capacity

542  
543  
544  
545  
546  
547  
548  
549

DW Bang et al

550 Table 2. Sociodemographic, and clinical characteristics of patients with *Escherichia coli* blood  
 551 stream infection and their matched control subjects

| Characteristics                                     | Case<br>(n= 259) | Control<br>(n= 259) | Unadjusted OR <sup>a</sup><br>(95% CI) | p value |
|-----------------------------------------------------|------------------|---------------------|----------------------------------------|---------|
| Age (years)                                         | 61±22            | 61±22               | 1.14 (0.78, 1.67)                      | 0.497   |
| Female gender                                       | 179 (69%)        | 179 (69%)           | -                                      |         |
| Ethnicity                                           |                  |                     |                                        | <0.001  |
| Caucasian (non-Hispanic)                            | 222 (86%)        | 245 (95%)           | Referent                               |         |
| Other                                               | 37 (14%)         | 14 (5%)             | 4.83 (2.01, 11.64)                     |         |
| Education status                                    |                  |                     |                                        | 0.004   |
| Some high school or less                            | 45 (17%)         | 21 (8%)             | Referent                               |         |
| High school graduate                                | 95 (37%)         | 87 (34%)            | 0.50 (0.27, 0.93)                      |         |
| Some college or more                                | 110 (42%)        | 143 (55%)           | 0.33 (0.18, 0.62)                      |         |
| Unknown                                             | 9 (3%)           | 8 (3%)              | -                                      |         |
| Influenza vaccination 1 year prior to<br>index date | 95 (37%)         | 110 (42%)           | 0.75 (0.51, 1.10)                      | 0.145   |
| PPV23 prior to index date                           | 117 (45%)        | 114 (44%)           | 1.08 (0.69, 1.68)                      | 0.736   |
| Food allergy                                        | 16 (6%)          | 6 (2%)              | 2.67 (1.04, 6.81)                      | 0.040   |
| Asthma                                              | 37 (14%)         | 16 (6%)             | 2.75 (1.42, 5.32)                      | 0.003   |
| High-risk conditions                                |                  |                     |                                        |         |
| Alcohol addiction                                   | 17 (7%)          | 1 (0%)              | 17.00 (2.26, 127.75)                   | 0.006   |
| Autoimmune disease <sup>c</sup>                     | 9 (3%)           | 3 (1%)              | 3.00 (0.81, 11.08)                     | 0.099   |
| Chronic obstructive lung disease                    | 12 (5%)          | 9 (3%)              | 1.37 (0.55, 3.42)                      | 0.493   |
| Chronic renal insufficiency                         | 30 (12%)         | 4 (2%)              | 9.67 (2.94, 31.73)                     | <0.001  |
| Congestive heart failure                            | 19 (7%)          | 2 (1%)              | 18.00 (2.40, 134.84)                   | 0.005   |
| Coronary artery disease                             | 52 (20%)         | 40 (15%)            | 1.46 (0.89, 2.41)                      | 0.136   |
| Dementia                                            | 16 (6%)          | 7 (3%)              | 3.25 (1.06, 9.97)                      | 0.039   |
| Diabetes mellitus                                   | 50 (19%)         | 24 (9%)             | 2.53 (1.44, 4.43)                      | 0.001   |
| History of stroke                                   | 15 (6%)          | 10 (4%)             | 1.71 (0.67, 4.35)                      | 0.257   |
| Immobilization <sup>d</sup>                         | 10 (4%)          | 1 (0%)              | 10.00 (1.28, 78.12)                    | 0.028   |
| Immunosuppressive therapy                           | 25 (10%)         | 4 (2%)              | 8.00 (2.41, 26.57)                     | 0.001   |
| Malignancy                                          | 21 (8%)          | 12 (5%)             | 2.00 (0.90, 4.45)                      | 0.090   |
| Recurrent urinary tract infection                   | 29 (11%)         | 2 (1%)              | 14.50 (3.46, 60.77)                    | <0.001  |
| Transplant recipients                               | 8(3%)            | 0 (0%)              | -                                      |         |
| Urinary incontinence                                | 46 (18%)         | 20 (8%)             | 2.86 (1.55, 5.25)                      | 0.001   |



DW Bang et al

|                              |           |           |                   |       |
|------------------------------|-----------|-----------|-------------------|-------|
| Other condition <sup>c</sup> | 14 (5%)   | 0 (0%)    | -                 | -     |
| Smoke                        |           |           |                   | 0.058 |
| No (including ex-smoker)     | 206 (80%) | 222 (86%) | Referent          |       |
| Active                       | 53 (20%)  | 37 (14%)  | 1.59 (0.98, 2.58) |       |

<sup>a</sup> Odds ratio based on matched analysis taking into account gender, birthday, residency, and follow-up duration

<sup>b</sup> Comorbidity conditions are not mutually exclusive

<sup>c</sup> Autoimmune disease includes SLE, rheumatoid arthritis, inflammatory bowel disease and other autoimmune diseases

<sup>d</sup> Immobilization includes hemi/para/quadri-plegia

<sup>e</sup> Other conditions include use of urinary catheter, device, genitourinary procedures (e.g., prostate biopsy), and congenital anomaly

For peer review only

1  
2  
3  
4  
5  
6  
7  
8  
9  
10  
11  
12  
13  
14  
15  
16  
17  
18  
19  
20  
21  
22  
23  
24  
25  
26  
27  
28  
29  
30  
31  
32  
33  
34  
35  
36  
37  
38  
39  
40  
41  
42  
43  
44  
45  
46  
47  
48  
49  
50  
51  
52  
53  
54  
55  
56  
57  
58  
59  
60

DW Bang et al

604 Table 3. A multivariable conditional logistic regression model for the association between  
 605 asthma and risk of community-acquired *Escherichia coli* bloodstream infection

| Characteristics                                     | Case<br>(n= 259) | Control<br>(n= 259) | Adjusted OR <sup>a</sup> (95% CI) | p value |
|-----------------------------------------------------|------------------|---------------------|-----------------------------------|---------|
| Ethnicity                                           |                  |                     |                                   | 0.003   |
| Caucasian (non-Hispanic)                            | 222 (86%)        | 245 (95%)           | Referent                          |         |
| Other                                               | 37 (14%)         | 14 (5%)             | 5.90 (1.85, 18.84)                |         |
| Education status                                    |                  |                     |                                   | 0.646   |
| Some high school or less                            | 45 (17%)         | 21 (8%)             | Referent                          |         |
| High school graduate                                | 95 (37%)         | 87 (34%)            | 0.89 (0.37, 2.14)                 |         |
| Some college or more                                | 110 (42%)        | 143 (55%)           | 0.65 (0.28, 1.50)                 |         |
| Unknown                                             | 9 (3%)           | 8 (3%)              | -                                 |         |
| Influenza vaccination 1 year prior<br>to index date | 95 (37%)         | 110 (42%)           | 0.58 (0.33, 1.02)                 | 0.058   |
| Food allergy                                        | 16 (6%)          | 6 (2%)              | 3.51 (0.94, 13.11)                | 0.062   |
| Asthma                                              | 37 (14%)         | 16 (6%)             | 2.74 (1.11, 6.76)                 | 0.029   |
| Active smoking                                      | 53 (20%)         | 37 (14%)            | 1.31 (0.69, 2.47)                 | 0.412   |
| High-risk conditions                                |                  |                     |                                   |         |
| Alcohol addiction                                   | 17 (7%)          | 1 (0%)              | 32.31 (1.91, 546.18)              | 0.016   |
| Autoimmune diseases                                 | 9 (3%)           | 3 (1%)              | 1.79 (0.23, 13.72)                | 0.574   |
| Chronic renal insufficiency                         | 30 (12%)         | 4 (2%)              | 4.76 (1.16, 19.59)                | 0.030   |
| Congestive heart failure                            | 19 (7%)          | 2 (1%)              | 9.86 (0.93, 104.59)               | 0.058   |
| Coronary artery disease                             | 52 (20%)         | 40 (15%)            | 0.81 (0.37, 1.77)                 | 0.593   |
| Dementia                                            | 16 (6%)          | 7 (3%)              | 4.14 (0.96, 17.96)                | 0.057   |
| Diabetes mellitus                                   | 50 (19%)         | 24 (9%)             | 2.39 (0.97, 5.87)                 | 0.057   |
| Immobilization                                      | 10 (4%)          | 1 (0%)              | 39.86 (2.30, 690.42)              | 0.011   |
| Immunosuppressive therapy                           | 25 (10%)         | 4 (2%)              | 8.51 (1.32, 54.96)                | 0.024   |
| Malignancy                                          | 21 (8%)          | 12 (5%)             | 2.18 (0.59, 8.11)                 | 0.243   |
| Recurrent urinary tract infection                   | 29 (11%)         | 2 (1%)              | 13.54 (2.42, 75.65)               | 0.003   |
| Urinary incontinence                                | 46 (18%)         | 20 (8%)             | 2.57 (1.05, 6.26)                 | 0.038   |

<sup>a</sup> Adjusted variables included all variables included in this table.

DW Bang et al

611 Table 4. Association of asthma control status and therapy with risk of community-acquired  
 612 *Escherichia coli* bloodstream infection

| Asthma characteristics               | Total<br>(n=518) | Unadjusted OR<br>(95% CI), p-value | Adjusted OR <sup>a</sup><br>(95% CI), p-value |
|--------------------------------------|------------------|------------------------------------|-----------------------------------------------|
| Inhaled corticosteroid therapy (ICS) |                  | $p=0.009^b$                        | $p=0.079^b$                                   |
| No asthma                            | 465 (90%)        | Referent                           | Referent                                      |
| Asthma without ICS                   | 35 (7%)          | 1.90 (0.88, 4.09)                  | 1.99 (0.67, 5.94)                             |
| Asthma with ICS                      | 18 (3%)          | 7.00 (1.59, 30.80)                 | 5.33 (0.90, 31.66)                            |
| Asthma status <sup>c</sup>           |                  | $p=0.005^b$                        | $p=0.067^b$                                   |
| No asthma                            | 465 (90%)        | Referent                           | Referent                                      |
| Remission or inactive asthma         | 17 (3%)          | 1.25 (0.45, 3.50)                  | 1.25 (0.25, 6.30)                             |
| Active or current asthma             | 36 (7%)          | 4.37 (1.80, 10.62)                 | 3.89 (1.23, 12.28)                            |

613 <sup>a</sup> Adjusted variables included all factors reported in the multivariable model (see Table 3) except for dichotomous asthma status

614 <sup>b</sup> P-value for overall comparison

615 <sup>c</sup> Active or current asthma was defined as the presence of asthma-related events including asthma symptoms, or use of asthma  
 616 medications, and outpatient/emergency department/hospitalization for asthma within one year prior to index date of E coli BSI;  
 617 Remission of asthma was defined as the absence of asthma-related events > 3 years prior to index date; Inactive (not current)  
 618 asthma was defined as the presence of asthma-related events within 1-3 years prior to index date.  
 619  
 620  
 621

STROBE Statement—Checklist of items that should be included in reports of *case-control studies*

|                                           | Item No | Recommendation                                                                                                                                                                                                                                                                                                                                    |
|-------------------------------------------|---------|---------------------------------------------------------------------------------------------------------------------------------------------------------------------------------------------------------------------------------------------------------------------------------------------------------------------------------------------------|
| <b>Title and abstract</b>                 | 1       | (a) Indicate the study's design with a commonly used term in the title or the abstract( <b>title</b> )<br>(b) Provide in the abstract an informative and balanced summary of what was done and what was found( <b>abstract</b> )                                                                                                                  |
| <b>Introduction</b>                       |         |                                                                                                                                                                                                                                                                                                                                                   |
| Background/rationale                      | 2       | Explain the scientific background and rationale for the investigation being reported( <b>lines 96-112</b> )                                                                                                                                                                                                                                       |
| Objectives                                | 3       | State specific objectives, including any prespecified hypotheses ( <b>lines 113-119</b> )                                                                                                                                                                                                                                                         |
| <b>Methods</b>                            |         |                                                                                                                                                                                                                                                                                                                                                   |
| Study design                              | 4       | Present key elements of study design early in the paper( <b>lines 139-140</b> )                                                                                                                                                                                                                                                                   |
| Setting                                   | 5       | Describe the setting, locations, and relevant dates, including periods of recruitment, exposure, follow-up, and data collection ( <b>lines 142-145/159/212-213</b> )                                                                                                                                                                              |
| Participants                              | 6       | (a) Give the eligibility criteria, and the sources and methods of case ascertainment and control selection. Give the rationale for the choice of cases and controls ( <b>table 1, 153~</b> )<br>(b) For matched studies, give matching criteria and the number of controls per case ( <b>176~</b> )                                               |
| Variables                                 | 7       | Clearly define all outcomes, exposures, predictors, potential confounders, and effect modifiers. Give diagnostic criteria, if applicable( <b>191-213</b> )                                                                                                                                                                                        |
| Data sources/<br>measurement              | 8*      | For each variable of interest, give sources of data and details of methods of assessment (measurement). Describe comparability of assessment methods if there is more than one group( <b>177-186</b> )                                                                                                                                            |
| Bias                                      | 9       | Describe any efforts to address potential sources of bias( <b>289-306</b> )                                                                                                                                                                                                                                                                       |
| Study size                                | 10      | Explain how the study size was arrived at( <b>186-190</b> )                                                                                                                                                                                                                                                                                       |
| Quantitative variables                    | 11      | Explain how quantitative variables were handled in the analyses. If applicable, describe which groupings were chosen and why( <b>214-224</b> )                                                                                                                                                                                                    |
| Statistical methods<br>( <b>214-224</b> ) | 12      | (a) Describe all statistical methods, including those used to control for confounding<br>(b) Describe any methods used to examine subgroups and interactions<br>(c) Explain how missing data were addressed( <b>N/A</b> )<br>(d) If applicable, explain how matching of cases and controls was addressed<br>(e) Describe any sensitivity analyses |
| <b>Results</b>                            |         |                                                                                                                                                                                                                                                                                                                                                   |
| Participants                              | 13*     | (a) Report numbers of individuals at each stage of study—eg numbers potentially eligible, examined for eligibility, confirmed eligible, included in the study, completing follow-up, and analysed ( <b>N/A</b> )<br>(b) Give reasons for non-participation at each stage( <b>N/A</b> )<br>(c) Consider use of a flow diagram( <b>N/A</b> )        |
| Descriptive data                          | 14*     | (a) Give characteristics of study participants (eg demographic, clinical, social) and information on exposures and potential confounders( <b>Table 2 &amp;3</b> )<br>(b) Indicate number of participants with missing data for each variable of interest( <b>Table 2 &amp;3</b> )                                                                 |
| Outcome data                              | 15*     | Report numbers in each exposure category, or summary measures of exposure( <b>Table 2 &amp;3</b> )                                                                                                                                                                                                                                                |
| Main results                              | 16      | (a) Give unadjusted estimates and, if applicable, confounder-adjusted estimates and                                                                                                                                                                                                                                                               |

|                          |    |                  |                                                                                                                                                                                     |
|--------------------------|----|------------------|-------------------------------------------------------------------------------------------------------------------------------------------------------------------------------------|
|                          |    | (Table 2, 3 & 4) | their precision (eg, 95% confidence interval). Make clear which confounders were adjusted for and why they were included                                                            |
|                          |    |                  | (b) Report category boundaries when continuous variables were categorized                                                                                                           |
|                          |    |                  | (c) If relevant, consider translating estimates of relative risk into absolute risk for a meaningful time period                                                                    |
| Other analyses           | 17 |                  | Report other analyses done—eg analyses of subgroups and interactions, and sensitivity analyses (Table 2 & 3)                                                                        |
| <b>Discussion</b>        |    |                  |                                                                                                                                                                                     |
| Key results              | 18 |                  | Summarise key results with reference to study objectives (277-281)                                                                                                                  |
| Limitations              | 19 |                  | Discuss limitations of the study, taking into account sources of potential bias or imprecision. Discuss both direction and magnitude of any potential bias(338-346)                 |
| Interpretation           | 20 |                  | Give a cautious overall interpretation of results considering objectives, limitations, multiplicity of analyses, results from similar studies, and other relevant evidence(334-347) |
| Generalisability         | 21 |                  | Discuss the generalisability (external validity) of the study results(346-349)                                                                                                      |
| <b>Other information</b> |    |                  |                                                                                                                                                                                     |
| Funding                  | 22 |                  | Give the source of funding and the role of the funders for the present study and, if applicable, for the original study on which the present article is based(356-360)              |

\*Give information separately for cases and controls.

**Note:** An Explanation and Elaboration article discusses each checklist item and gives methodological background and published examples of transparent reporting. The STROBE checklist is best used in conjunction with this article (freely available on the Web sites of PLoS Medicine at <http://www.plosmedicine.org/>, Annals of Internal Medicine at <http://www.annals.org/>, and Epidemiology at <http://www.epidem.com/>). Information on the STROBE Initiative is available at <http://www.strobe-statement.org>.

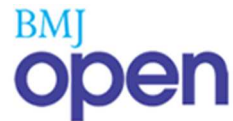

**Asthma and Risk of Non-Respiratory Tract Infection: A  
Population-Based Case Control Study**

|                                    |                                                                                                                                                                                                                                                                                                                                                                                                  |
|------------------------------------|--------------------------------------------------------------------------------------------------------------------------------------------------------------------------------------------------------------------------------------------------------------------------------------------------------------------------------------------------------------------------------------------------|
| Journal:                           | <i>BMJ Open</i>                                                                                                                                                                                                                                                                                                                                                                                  |
| Manuscript ID:                     | bmjopen-2013-003857.R1                                                                                                                                                                                                                                                                                                                                                                           |
| Article Type:                      | Research                                                                                                                                                                                                                                                                                                                                                                                         |
| Date Submitted by the Author:      | 28-Aug-2013                                                                                                                                                                                                                                                                                                                                                                                      |
| Complete List of Authors:          | Juhn, Young; Mayo Clinic, Community Pediatrics and Adolescent Medicine<br>Bang, Duk; Mayo Clinic,<br>Yang, Hyeon; Soon Chun Hyang University Hospital,<br>Ryoo, Eell; Gil Hospital - Gachon University,<br>Al-Hasan, Majdi; University of Kentucky Medical Center,<br>Lahr, Brian; Mayo Clinic,<br>Baddour, Larry; Mayo Clinic,<br>Yawn, Barbara; Olmsted Medical Center, Department of Research |
| <b>Primary Subject<br>Heading</b>: | Epidemiology                                                                                                                                                                                                                                                                                                                                                                                     |
| Secondary Subject Heading:         | Respiratory medicine                                                                                                                                                                                                                                                                                                                                                                             |
| Keywords:                          | Asthma < THORACIC MEDICINE, EPIDEMIOLOGY, Gastrointestinal<br>infections < GASTROENTEROLOGY                                                                                                                                                                                                                                                                                                      |
|                                    |                                                                                                                                                                                                                                                                                                                                                                                                  |

SCHOLARONE™  
Manuscripts

STROBE Statement—Checklist of items that should be included in reports of *case-control studies*

|                                           | Item No | Recommendation                                                                                                                                                                                                                                                                                                                                    |
|-------------------------------------------|---------|---------------------------------------------------------------------------------------------------------------------------------------------------------------------------------------------------------------------------------------------------------------------------------------------------------------------------------------------------|
| <b>Title and abstract</b>                 | 1       | (a) Indicate the study's design with a commonly used term in the title or the abstract( <b>title</b> )<br>(b) Provide in the abstract an informative and balanced summary of what was done and what was found( <b>abstract</b> )                                                                                                                  |
| <b>Introduction</b>                       |         |                                                                                                                                                                                                                                                                                                                                                   |
| Background/rationale                      | 2       | Explain the scientific background and rationale for the investigation being reported( <b>lines 96-112</b> )                                                                                                                                                                                                                                       |
| Objectives                                | 3       | State specific objectives, including any prespecified hypotheses ( <b>lines 113-119</b> )                                                                                                                                                                                                                                                         |
| <b>Methods</b>                            |         |                                                                                                                                                                                                                                                                                                                                                   |
| Study design                              | 4       | Present key elements of study design early in the paper( <b>lines 139-140</b> )                                                                                                                                                                                                                                                                   |
| Setting                                   | 5       | Describe the setting, locations, and relevant dates, including periods of recruitment, exposure, follow-up, and data collection ( <b>lines 142-145/159/212-213</b> )                                                                                                                                                                              |
| Participants                              | 6       | (a) Give the eligibility criteria, and the sources and methods of case ascertainment and control selection. Give the rationale for the choice of cases and controls ( <b>table 1, 153~</b> )<br>(b) For matched studies, give matching criteria and the number of controls per case ( <b>176~</b> )                                               |
| Variables                                 | 7       | Clearly define all outcomes, exposures, predictors, potential confounders, and effect modifiers. Give diagnostic criteria, if applicable( <b>191-213</b> )                                                                                                                                                                                        |
| Data sources/<br>measurement              | 8*      | For each variable of interest, give sources of data and details of methods of assessment (measurement). Describe comparability of assessment methods if there is more than one group( <b>177-186</b> )                                                                                                                                            |
| Bias                                      | 9       | Describe any efforts to address potential sources of bias( <b>289-306</b> )                                                                                                                                                                                                                                                                       |
| Study size                                | 10      | Explain how the study size was arrived at( <b>186-190</b> )                                                                                                                                                                                                                                                                                       |
| Quantitative variables                    | 11      | Explain how quantitative variables were handled in the analyses. If applicable, describe which groupings were chosen and why( <b>214-224</b> )                                                                                                                                                                                                    |
| Statistical methods<br>( <b>214-224</b> ) | 12      | (a) Describe all statistical methods, including those used to control for confounding<br>(b) Describe any methods used to examine subgroups and interactions<br>(c) Explain how missing data were addressed( <b>N/A</b> )<br>(d) If applicable, explain how matching of cases and controls was addressed<br>(e) Describe any sensitivity analyses |
| <b>Results</b>                            |         |                                                                                                                                                                                                                                                                                                                                                   |
| Participants                              | 13*     | (a) Report numbers of individuals at each stage of study—eg numbers potentially eligible, examined for eligibility, confirmed eligible, included in the study, completing follow-up, and analysed ( <b>N/A</b> )<br>(b) Give reasons for non-participation at each stage( <b>N/A</b> )<br>(c) Consider use of a flow diagram( <b>N/A</b> )        |
| Descriptive data                          | 14*     | (a) Give characteristics of study participants (eg demographic, clinical, social) and information on exposures and potential confounders( <b>Table 2 &amp;3</b> )<br>(b) Indicate number of participants with missing data for each variable of interest( <b>Table 2 &amp;3</b> )                                                                 |
| Outcome data                              | 15*     | Report numbers in each exposure category, or summary measures of exposure( <b>Table 2 &amp;3</b> )                                                                                                                                                                                                                                                |
| Main results                              | 16      | (a) Give unadjusted estimates and, if applicable, confounder-adjusted estimates and                                                                                                                                                                                                                                                               |

|                          |    |                  |                                                                                                                                                                                     |
|--------------------------|----|------------------|-------------------------------------------------------------------------------------------------------------------------------------------------------------------------------------|
|                          |    | (Table 2, 3 & 4) | their precision (eg, 95% confidence interval). Make clear which confounders were adjusted for and why they were included                                                            |
|                          |    |                  | (b) Report category boundaries when continuous variables were categorized                                                                                                           |
|                          |    |                  | (c) If relevant, consider translating estimates of relative risk into absolute risk for a meaningful time period                                                                    |
| Other analyses           | 17 |                  | Report other analyses done—eg analyses of subgroups and interactions, and sensitivity analyses (Table 2 & 3)                                                                        |
| <b>Discussion</b>        |    |                  |                                                                                                                                                                                     |
| Key results              | 18 |                  | Summarise key results with reference to study objectives (277-281)                                                                                                                  |
| Limitations              | 19 |                  | Discuss limitations of the study, taking into account sources of potential bias or imprecision. Discuss both direction and magnitude of any potential bias(338-346)                 |
| Interpretation           | 20 |                  | Give a cautious overall interpretation of results considering objectives, limitations, multiplicity of analyses, results from similar studies, and other relevant evidence(334-347) |
| Generalisability         | 21 |                  | Discuss the generalisability (external validity) of the study results(346-349)                                                                                                      |
| <b>Other information</b> |    |                  |                                                                                                                                                                                     |
| Funding                  | 22 |                  | Give the source of funding and the role of the funders for the present study and, if applicable, for the original study on which the present article is based(356-360)              |

\*Give information separately for cases and controls.

**Note:** An Explanation and Elaboration article discusses each checklist item and gives methodological background and published examples of transparent reporting. The STROBE checklist is best used in conjunction with this article (freely available on the Web sites of PLoS Medicine at <http://www.plosmedicine.org/>, Annals of Internal Medicine at <http://www.annals.org/>, and Epidemiology at <http://www.epidem.com/>). Information on the STROBE Initiative is available at <http://www.strobe-statement.org>.



1 DW Bang et al

2  
3 1 TITLE PAGE

4  
5 2 Original Article

6  
7 3 **Asthma and Risk of Non-Respiratory Tract Infection: A Population-Based Case Control**

8  
9 4 **Study**

10  
11 5  
12  
13 6 Duk Won Bang, MD<sup>a,b</sup>, Hyeon J. Yang, MD<sup>c</sup>, Eell Ryoo, MD<sup>a,d</sup>, Majdi N. Al-Hasan, MD<sup>e</sup>,

14  
15 7 Brian Lahr, MS,<sup>f</sup> Larry M. Baddour, MD<sup>g</sup>, Barbara P. Yawn, MD<sup>h</sup>, and Young J. Juhn, MD<sup>a,i</sup>

16  
17 8

18  
19 9 <sup>a</sup>Department of Pediatric and Adolescent Medicine, Mayo Clinic, Rochester, MN

20  
21 10 <sup>b</sup>Department of Internal Medicine, Soonchunhyang University Hospital, Seoul, South Korea

22  
23 11 <sup>c</sup>Department of Pediatrics, Soonchunhyang University Hospital, Seoul, South Korea

24  
25 12 <sup>d</sup>Department of Pediatrics, Gil Hospital, Gachon University School of Medicine, Incheon, South

26  
27 13 Korea

28  
29 14 <sup>e</sup>Department of Medicine, University of Kentucky Medical Center, Lexington, KY

30  
31 15 <sup>f</sup>Division of Biomedical Statistics and Informatics, Mayo Clinic, Rochester, MN

32  
33 16 <sup>g</sup>Department of Medicine, Mayo Clinic, Rochester, MN

34  
35 17 <sup>h</sup>Department of Research, Olmsted Medical Center, Rochester, MN

36  
37 18 <sup>i</sup>Department of Internal Medicine, Mayo Clinic, Rochester, MN

38  
39 19 **Corresponding author**

40  
41 20 Young J. Juhn, M.D., M.P.H

42  
43 21 Division of Community Pediatric and Adolescent Medicine

44  
45 22 Department of Pediatric and Adolescent Medicine/Internal Medicine

46  
47 23 Mayo Clinic

1 DW Bang et al

2  
3 24 200 1<sup>st</sup> Street SW

4  
5 25 Rochester, MN 55905

6  
7 26 TEL: 507-538-1642

8  
9 27 FAX: 507-284-9744

10  
11 28 E-mail: juhn.young@mayo.edu

12  
13  
14 29

15  
16  
17 30 Funding: This work was supported by the Clinician Scholarly Award from the Mayo foundation  
18 31 and a grant from the National Institute of Allergy and Infectious Diseases (R21 AI101277). It  
19 32 was also supported by the Rochester Epidemiology Project (R01-AG34676) from the National  
20 33 Institute on Aging.

21  
22  
23  
24 34

25  
26  
27 35 Conflict of interest: The study investigators have nothing to disclose that poses a conflict of  
28 36 interest.

29  
30  
31  
32 37

33  
34  
35 38 We reviewed the STROBE statement and addressed all items in that checklist and are  
36 39 submitting the STROBE statement with the revised manuscript.

37  
38  
39  
40 40

41  
42 41 Key Words: Asthma, Risk, Epidemiology, Community-acquired infections, *Escherichia Coli*,  
43 42 Blood stream infection, genitourinary, and gastrointestinal tract

44  
45 43 Abbreviations: BSI: blood stream infection, *E.Coli*: *Escherichia Coli*, TLR : Toll-like Receptor,

46  
47 44 ICS : inhaled corticosteroid, PPV23: 23-valent pneumococcal polysaccharide vaccine

48  
49 45 Word count: 2993

50  
51  
52  
53 54

54  
55  
56  
57 58

58  
59  
60 59

60  
61 60

DW Bang et al

46 Article summary

47 1. Article focus: We addressed the following question in this study.

48 - Given the association between asthma and airway-related infection, is asthma also associated  
49 with non-airway-related serious infections such as *Escherichia coli* blood stream infection?

50 2. Key messages

51 - Individuals with asthma are at a significantly increased risk of non-airway-related infection,  
52 including community-acquired *E. coli* blood stream infection.

53 - The impact of asthma on risks of microbial infections may go beyond airways.

54 - Clinicians and patients should be aware of the association and recognize the risk of subsequent  
55 infection.

56 3. Strength and limitations

57 - This is the first population-based case-control study using predetermined criteria for asthma  
58 status and community-acquired *Escherichia coli* blood stream infection.

59 - The main limitation of the study is inherent limitations as a retrospective study and the study  
60 subjects were predominantly white.

62 Contributors

63 BDW collected data, interpreted the results, and drafted the manuscript; HJY participated in the  
64 study design, interpreted the results and reviewed the manuscript; ER collected data, interpreted  
65 the results, and reviewed manuscript; MNA assembled the original dataset for the *E. coli* BSI  
66 study, collected the original data, interpreted the results, and reviewed the manuscript; LMB  
67 participated in the study design, interpreted the results, and reviewed the manuscript; BPY  
68 participated in the study design, interpreted the results, and reviewed manuscript; and YJJ

DW Bang et al

1  
2  
3 69 participated in the study design, performed data analysis, interpreted the results, and drafted the  
4  
5 70 manuscript. BDW, ER, and YJJ had full access to data. All authors reviewed and approved the  
6  
7  
8 71 paper.  
9

10 72 There will be no additional data available.  
11  
12  
13 73  
14  
15 74  
16  
17 75  
18  
19 76  
20  
21 77  
22  
23 78  
24  
25 79  
26  
27 80  
28  
29 81  
30  
31 82  
32  
33 83  
34  
35 84  
36  
37 85  
38  
39 86  
40  
41 87  
42  
43 88  
44  
45 89  
46  
47 90  
48  
49 91  
50  
51  
52  
53  
54  
55  
56  
57  
58  
59  
60

For peer review only

DW Bang et al

92 **Abstract:**

93 Objectives: Asthmatics have increased risks of airway-related infections. Little is known about  
94 whether this is true for non-airway-related serious infections such as *Escherichia coli* blood  
95 stream infection (BSI). We assessed whether asthma is associated with a risk of developing  
96 community-acquired *E. coli* BSI.

97 Design: The study was designed as a population-based retrospective case-control study.

98 Setting: This population-based study was conducted in Olmsted County, Minnesota.

99 Participants: The study included 259 all eligible community-acquired *E. coli* BSI cases in  
100 Olmsted County, MN between 1998 and 2007 and 259 birthday-, gender-, and residency-  
101 matched controls.

102 Primary and secondary outcome measures: Only community-acquired *E. coli* BSI cases as the  
103 primary outcome was included. Asthma status as an exposure was ascertained by predetermined  
104 criteria. An adjusted odds ratio (OR) and 95% confidence interval (CI) for the association  
105 between asthma and risk of community-acquired *E. coli* BSI was calculated using conditional  
106 logistic regression.

107 Results: Of 259 eligible cases, 179 (69 %) were female and mean age was 61±22 years. Thirty-  
108 seven of 259 cases (14%) and 16 of 259 controls (6%) had a prior history of asthma (adjusted  
109 OR: 2.74; 95% CI: 1.11-6.76; p=0.029). The population attributable risk of asthma for  
110 community-acquired *E. coli* BSI was 9%. Although not statistically significant, there was a  
111 borderline association between having a history of food allergy and increased risk of community-  
112 acquired *E. coli* BSI (6% vs 2%; adjusted OR: 3.51; 95% CI: 0.94-13.11, p=0.062).

113 Conclusions: Based on the findings of the current population-based, case-control investigation, a  
114 history of asthma may be associated with risk of community-acquired *E. coli* BSI. The impact of

DW Bang et al

115 asthma on risk of microbial infections may go beyond airways.

116

117 **Abstract Word Count:** 246

## 118 INTRODUCTION

119 Asthma is the most common chronic illness in childhood and is a major cause of  
120 morbidity in adults, affecting 4-17% of children and 7.7% of adults in the US.(1-3)] About 300  
121 million people globally are estimated to be affected by asthma.(4)

122 Previous studies showed increased risks of microbial infections among individuals with  
123 asthma(5-10) and the population attributable risk for asthma of serious pneumococcal disease  
124 was 11-17%.(6, 10) Impaired innate and adaptive immune functions among asthmatics have  
125 been suggested for potential underlying mechanisms.(11-18) These study results are based on  
126 microbial infections of the airways. However, little is known about whether asthma status is  
127 associated with risk of non-airway-related bacterial infections such as community-acquired  
128 *Escherichia coli* blood stream infection (BSI).

129 Addressing this question should provide an important insight into the nature of the impact  
130 of asthma status on susceptibility to microbial infection. Specifically, it will improve our  
131 understanding on whether the impact of asthma status on susceptibility to infection goes beyond  
132 airways. In investigating this question, community-acquired *E. coli* BSI is suitable because it is  
133 not an airway-related infection but genitourinary tract/gastrointestinal origin, *E. coli* is a gram-  
134 negative bacterium with Toll-like Receptor (TLR)-4-mediated signal transduction for innate  
135 immunity, and *E. coli* is the most common cause of community-acquired BSI.(19) Up to 30% of  
136 individuals who developed community-acquired *E. coli* BSI did not have known risk

DW Bang et al

137 factors,[<sup>(20)</sup>] suggesting that unrecognized risk factors exist that are associated with the  
138 development of community-acquired *E. coli* BSI.

139 Investigating the relationship between asthma and non-airway-related serious bacterial  
140 infections will advance our understanding on the extent to which asthma impacts susceptibility to  
141 microbial infections and whether asthma could be an unrecognized risk factor for non-airway-  
142 related bacterial infections.

143 We hypothesize that individuals with asthma have an increased risk of community-  
144 acquired *E. coli* BSI, as compared to those without asthma. To test this hypothesis, we conducted  
145 a population-based retrospective case-control study.

DW Bang et al

160

161

162

163

## 164 **METHODS**

165 The study was approved by the Institutional Review Boards of both Mayo Clinic and

166 Olmsted Medical Center. This study was designed as a population-based case-control study.

### 167 **Study population and setting**

168 Olmsted County, Minnesota is an excellent setting to conduct a population-based

169 epidemiologic study such as this because medical care is virtually self-contained within the

170 community (nearly all Olmsted County residents receive medical cares from two medical centers

171 in the community). The population characteristics of Olmsted County residents are similar to

172 those of non-Hispanic white.(21) If one grants the authorization for using medical record for

173 research (almost 95% of Olmsted County residents), each patient is assigned a unique identifier

174 under the auspices of the Rochester Epidemiology Project (REP).(22) Using REP resources, we

175 previously demonstrated that incidence rates of asthma for this community are similar to other

176 communities. The annual incidence rate of asthma in Rochester was 238 cases per 100,000

177 persons, which is comparable to those in other communities such as Tecumseh, Michigan

178 (250/100,000).(23)

### 179 **Study subjects: Case ascertainment**

180 To test our study hypothesis, we utilized a population-based incidence parent study,

181 which previously identified the community-acquired cases to study antimicrobial resistance

182 trends of *E. coli* BSI in the community. Details of the case ascertainment have been described



DW Bang et al

1  
2  
3 183 previously.(19) Briefly, using the microbiology databases at Mayo Clinic Rochester and Olmsted  
4  
5 184 Medical Center, all eligible children and adults with monomicrobial *E. coli* BSI (n=274) among  
6  
7  
8 185 Olmsted County residents from January 1, 1998 to December 31, 2007 (i.e., a population-based  
9  
10 186 all incident cases of *E. coli* BSI ) were identified based on the criteria suggested by Freidman et  
11  
12 187 al.(24) As *E. coli* BSI is required for inpatient parental treatment, community-acquired *E. coli*  
13  
14 188 BSI was defined by isolation of *E. coli* from blood cultures at the time of hospital admission or  
15  
16 189 within 48 hours after hospital admission for patients who did not fit criteria for health care–  
17  
18 190 associated infection according to the Freidman’s criteria.(24) Medical records of all subjects  
19  
20 191 were reviewed by investigators of the previous study (MNA) to confirm the diagnosis of  
21  
22 192 community-acquired *E. coli* BSI, assess clinical features, and determine the eligibility. Only  
23  
24 193 community-acquired *E. coli* BSI was included because nosocomial and health care-associated *E.*  
25  
26 194 *coli* BSI are unsuitable to address the aim of the present study (clinically, they are a high-risk  
27  
28 195 population for *E. coli* BSI and not representative of the study population). The index date of BSI  
29  
30 196 was defined as the date when blood cultures that eventually grew *E. coli* were obtained.  
31  
32 197 Exclusion criteria for cases (and controls) included: 1) polymicrobial BSI caused by more than  
33  
34 198 one microorganism, 2) blood cultures acquired at autopsy, 3) nosocomial and health care-  
35  
36 199 associated *E. coli* BSI, 4) non-Olmsted County residency at the time of index date of BSI, 5) no  
37  
38 200 research authorization for using medical record for research, and 6) health conditions making  
39  
40 201 ascertainment of asthma difficult listed in Table 1.

### 202 **Selection of control subjects**

41  
42 203 Control subjects were randomly selected with 1:1 matching from Olmsted County  
43  
44 204 residents who had not had a history of *E. coli* BSI at the end of the study period. Briefly, a list of  
45  
46 205 potential control subjects who had received medical care from either Mayo Clinic or Olmsted  
47  
48  
49  
50  
51  
52  
53  
54  
55  
56  
57  
58  
59  
60

DW Bang et al

1  
2  
3 206 Medical Center and who met the matching criteria was generated and randomly selected from the  
4  
5 207 REP database for the present study. The matching criteria included: 1) gender, 2) birth date  
6  
7  
8 208 (within six months for those <18 years of age and within one year for those > 18 years of age), 3)  
9  
10 209 the same clinic registration year as matched case (within one year), and 4) closest clinic visit to  
11  
12 210 index date of matched case within one year. The index date for control subjects was defined as  
13  
14 211 the closest (within one year) clinic visit date to index date of BSI for their corresponding  
15  
16 212 matched case. Based on the number of cases and controls enrolled in this present study (259  
17  
18 213 pair), assuming 8% of asthma prevalence among controls, this present study had 80% power to  
19  
20 214 detect an effect size of 2.27 of odds ratio (16.5% of asthma in cases). This effect size was  
21  
22 215 smaller than the reported effect sizes for the association between asthma and risk of microbial  
23  
24 216 infection (OR: 2.4-6.7) suggesting adequate statistical power to address the study aim.(6, 10)

### 29 217 **Exposure ascertainment (asthma status)**

30  
31 218 For determining asthma status of all cases and controls, we conducted comprehensive  
32  
33 219 medical record reviews to apply predetermined criteria for asthma as performed in our previous  
34  
35 220 work.(5, 6) The criteria are delineated in Table 1. These criteria have been extensively used in  
36  
37 221 research for asthma epidemiology and were found to have high reliability.(25-30) We included  
38  
39 222 both definite and probable asthma according to the criteria prior to the index date of BSI cases  
40  
41 223 because most probable asthmatics become definite over time.(6, 31) The incidence dates (the  
42  
43 224 first date when one met the criteria for asthma) for all asthmatic patients were determined; thus,  
44  
45 225 we were able to discern the temporal relationship between asthma status (exposure) and *E coli*  
46  
47 226 BSI (outcome). The risk of *E. coli* BSI was assessed in relation to the current asthma status(32):  
48  
49 227 remission (no asthma symptoms, no asthma-related visits, or no asthma medications for at least  
50  
51 228 three years prior to index date); active or current asthma (presence of clinical symptoms, asthma-  
52  
53  
54  
55  
56  
57  
58  
59  
60

DW Bang et al

229 related visits, or asthma medications within one year prior to index date); and inactive (not  
230 current) asthma (presence of asthma symptoms, asthma-related visits, or asthma medications  
231 within 1-3 years prior to index date).

### 232 **Other variables**

233 Pertinent covariates and confounders were collected from medical records:  
234 sociodemographic variables (age, gender, ethnicity, and educational status), asthma medications  
235 including inhaled and systemic corticosteroids, family history of asthma, atopic status based on  
236 sensitization against aeroallergens and food allergens, smoking status (either active or passive  
237 exposure to tobacco smoke), vaccination status, and co-morbid conditions at the time of index  
238 date as listed in Table 2. The period of data collection was from October 1, 2011 to May 30,  
239 2012.

### 240 **Statistical analysis**

241 Formal comparison of asthma and other suspected risk factors between matched cases  
242 and controls was performed using conditional logistic regression, with community-acquired *E.*  
243 *coli* BSI as the target of prediction. All factors were analyzed for a univariate association with  
244 BSI, and any variables meeting the Greenland entry criteria ( $P < 0.2$ ) were carried forward into a  
245 final multivariable model.(33) Odds ratios (OR) from univariate (unadjusted) and multivariable  
246 (adjusted) models are reported to express the magnitude of association in terms of the likelihood  
247 of being a case. We calculated the population attributable risk percentage (PAR%) of asthma for  
248 community-acquired *E. coli* BSI using the formula established by Miettinen.(34) Statistical  
249 significance was tested at a two-sided alpha error of 0.05. All analyses were carried out with the  
250 statistical software package SAS, version 9.2 (SAS Institute, Cary, NC, USA).

251

DW Bang et al

252

253

254

255

**RESULTS****Study subjects**

Of the 274 patients who were identified in the original study, 259 were eligible for the present study. Fifteen patients were excluded; five for consistent FEV1 < 50%, two for restrictive lung disease, two for significant kyphoscoliosis, two for bronchiectasis, one for cystic fibrosis, one for pulmonary fibrosis, and two due to non-Olmsted County residency. Of the eligible 259 cases, 179 (69%) were female, 249 (96%) were 18 years of age or older (age mean±standard deviation, 61±22 years), and 222 (86%) were Caucasian. The characteristics of the cases and their matched controls, and the individual associations with community-acquired *E. coli* BSI, are summarized in Table 2. There were only 10 asthmatics on moderate- or high-dose inhaled corticosteroid (ICS) and two asthmatics on systemic corticosteroid at the time of the index date. Comparing subjects with asthma versus those without, there was no significant difference in the proportions, who had received influenza vaccine (40% vs. 40%, p=0.99) or PPV23 (49% vs. 44%, p=0.49) within one year prior to index date.

**Association between asthma and risk of community-acquired *E. coli* BSI**

Thirty-seven of 259 (14%) cases had a history of asthma prior to the index date of community-acquired *E. coli* BSI, compared with 16 of 259 (6%) controls (unadjusted OR: 2.75; 95% CI: 1.42-5.32; p=0.003). Of the 37 case subjects with asthma, 33 (89%) had definite asthma and 4 (11%) had probable asthma. Of the 16 controls with asthma, 12 (75%) had definite asthma and 4

DW Bang et al

1  
2  
3 275 (25%) had probable asthma. Among all 53 asthmatics, 18 were on ICS therapy at the index date  
4  
5  
6 276 (8 on low-dose ICS and 10 on moderate to high-dose ICS therapy). The effect of asthma on risk  
7  
8 277 of community-acquired *E. coli* BSI, independent of other risk factors, is summarized in Table 3.  
9  
10 278 Subjects with a history of asthma by predetermined criteria for asthma in Table 1 had a nearly 3-  
11  
12 279 fold higher risk of developing community-acquired *E. coli* BSI compared to those without  
13  
14 280 asthma, controlling for all potential confounding factors (adjusted OR: 2.74; 95% CI: 1.11-6.76;  
15  
16 281  $p=0.029$ ). The PAR% of asthma by predetermined criteria for asthma in Table 1 for the risk of *E.*  
17  
18 282 *coli* BSI was 9%. The  $p$ -values for testing a significant interaction between asthma and  
19  
20 283 categorized age were as follows:  $p=0.285$  for age cutoff of 65 years (i.e.,  $\geq 65$  vs.  $<65$  years),  
21  
22 284  $p=0.958$  for age cutoff of 40 years (i.e.,  $\geq 40$  vs.  $<40$  years), and  $p=0.417$  for age cutoffs of 40  
23  
24 285 years and 65 years (i.e.,  $<40$ , 40-65, vs.  $>65$  years). As a result, we have no evidence of a  
25  
26 286 differential asthma effect across age strata. Additional characteristics of asthma were also  
27  
28 287 evaluated for an association with risk of community-acquired *E. coli* BSI (see Table 4). Adjusted  
29  
30 288 for other factors, active asthma was associated with increased risk of *E. coli* BSI but for  
31  
32 289 asthmatics on ICS therapy compared to non-asthmatics, but the overall 3-level effect was not  
33  
34 290 statistically significant ( $p=0.079$ ).

#### 291 **Other variables and *E. coli* BSI**

292 Several of the high-risk conditions, as well as non-Caucasian ethnicity, were independently  
293 associated with increased risk of community-acquired *E. coli* BSI (see Tables 2 and 3). A history  
294 of food allergy was found in 16 (6%) of 259 cases as compared with 6 (2%) of 259 controls  
295 (adjusted OR: 3.51; 95% CI: 0.94-13.11;  $p=0.062$ ). Neither allergic rhinitis ( $p=0.82$ ) nor atopic  
296 dermatitis ( $p=0.87$ ) was found to be significantly associated with community-acquired *E. coli*  
297 BSI.

DW Bang et al

298

299

300

301

302

**DISCUSSION**

To our knowledge, this is the first population-based, case-control study that demonstrated an association between asthma and risk of non-respiratory bacterial infection such as community-acquired *E. coli* BSI. This association was independent of other risk factors including age, gender, follow-up duration, ethnicity, educational level, and comorbid conditions (adjusted OR: 2.74; 95% CI: 1.11-6.76; p=0.029). Analyses by different age cut-offs showed that the results were not affected by age effect (e.g., younger vs. older than 40 years of age). Given either the previously-reported non association (hazard ratio, HR: 1.29, 95%CI: 0.53-3.12) or a protective effect (HR: 0.52, 95%CI:0.36-0.76) of ICS therapy on risk of pneumonia in asthmatics(35) and a small number of asthmatics with moderate or high-dose ICS in our study (10 of 53, 19%), we suspect that active or current asthma (or collectively those given ICS therapy) might be related to risk of community-acquired *E. coli* BSI instead of ICS alone. There were only 2 asthmatics on systemic corticosteroid therapy at the time of the index date; therefore, exposure to systemic corticosteroid therapy was unlikely to account for the observed association. We believe that susceptibility bias (e.g., covariate imbalance at baseline) is unlikely to account for the association found in our study given the full adjustment for potential confounders. One concern could be detection bias stemming from a situation where exposure status (asthma status) systematically affects detection of outcomes. However, given *E. coli* BSI as a life-threatening condition, this is

DW Bang et al

1  
2  
3 321 unlikely and also there was no significant difference in symptom duration from BSI-related  
4  
5 322 symptom to index date between asthma and non-asthma in cases ( $4.7\pm 5.5$  vs  $5.2\pm 5.5$  days,  
6  
7  
8 323  $p=0.61$ ). Since detection of asthma depends on follow-up duration from registration to index  
9  
10 324 date of community-acquired *E. coli* BSI, we designed our study to ensure that duration was  
11  
12 325 similar between cases and controls. Asthma prevalence in controls in our study was 6%, which is  
13  
14 326 similar to that in adults (7%) in the United States (5.5% for males and 9.7% for females).(36)  
15  
16 327 Also, the prevalence of other common chronic condition such as coronary heart disease in our  
17  
18 328 study (15%) was similar to the national average (7.1% for adults aged 45-64 years and 19.8% for  
19  
20 329 adults aged  $\geq 65$  years) suggesting that our control group may reasonably represent a general  
21  
22 330 population of adults in the United States.(3) There were no significant differences in influenza  
23  
24 331 and PPV23 vaccination rates between cases and controls, which may imply similar access to  
25  
26 332 health care services. Also, food allergy approached to statistical significant association with risk  
27  
28 333 of *E coli* BSI but other atopic conditions were not. This is probably due to greater  
29  
30 334 misclassification bias of ascertainment of allergic rhinitis and atopic dermatitis by ICD-9 code  
31  
32 335 compared to asthma status and food allergy by predetermined criteria in our study. Taken  
33  
34 336 together, our study results suggest that asthma status is independently associated with risk of  
35  
36 337 community-acquired *E. coli* BSI.  
37  
38  
39  
40  
41  
42  
43

44 338 There are only a few previous studies, which assessed the incidence of *E. coli* BSI and  
45  
46 339 risk factors associated with its development, including asthma. One study showed a higher risk  
47  
48 340 of community-acquired *E. coli* BSI in asthmatics compared to non-asthmatics among those over  
49  
50 341 65 years of age (5.5% vs. 1%).(37) However, another study showed reduced risk of *E. coli* BSI  
51  
52 342 in asthmatics (rate ratio: 0.3; 95% CI: 0.2-0.4) compared to that in total regional population.(38)  
53  
54 343 These studies have significant limitations including no *a priori* hypothesis testing on the  
55  
56  
57  
58  
59  
60



DW Bang et al

1  
2  
3 344 relationship between asthma and risk of community-acquired *E. coli* BSI, utilization of  
4  
5 345 administrative data from health care organizations or case reports, ascertainment of *E. coli* BSI  
6  
7  
8 346 cases and asthma based on ICD-9 code, inclusion of only elderly patients aged over 65 years,(37)  
9  
10 347 and no concurrent control group.(38) Thus, our study is the first population-based case-control  
11  
12 348 study that demonstrated a relationship between asthma and risk of community-acquired *E. coli*  
13  
14 349 BSI. Several studies showed increased risks of microbial infections in asthmatics[(5-7, 10, 11)  
15  
16 350 but these studies only addressed the relationship between asthma and airway infections.  
17  
18  
19

20 351 The mechanisms underlying the apparent association between asthma and risk of  
21  
22 352 community-acquired *E. coli* BSI are unknown. Whether previously reported impaired innate  
23  
24 353 immune factors that may predispose to infections due to viruses(13, 39, 40) and other bacteria  
25  
26 354 are operative in community-acquired *E. coli* BSI is undefined. Recently, Habibzay et al reported  
27  
28 355 impaired innate immunity against pneumococci through impaired TLR-receptor signal  
29  
30 356 transduction by house dust mite allergic sensitization resulting in reduced neutrophil recruitment  
31  
32 357 and increased risk of pneumococcal infection in the airways.(11) It is worth investigating  
33  
34 358 whether allergic sensitization can induce similar impairment of innate immunity through TLR-4  
35  
36 359 for gram-negative bacteria in genitourinary or gastrointestinal tracts in asthmatics. Also, an  
37  
38 360 adaptive immune response to gram-negative bacteria might be altered in asthmatics,(41) which  
39  
40 361 may affect susceptibility to gram-negative bacterial infection. For example, Koch et al reported  
41  
42 362 impaired Type 1 helper T cell (Th1) response (interleukin-12-induced interferon- $\gamma$  release from T  
43  
44 363 lymphocytes) to endotoxin from *Salmonella enteritidis* in asthmatics.(42) Further studies are  
45  
46 364 needed to address our study findings.  
47  
48  
49  
50  
51  
52

53 365 The main strengths of our study are a population-based study design and include the  
54  
55 366 epidemiologic merits of self-contained health care environment with comprehensive medical  
56  
57  
58  
59  
60



DW Bang et al

1  
2  
3 367 record system for research. We identified population-based all incident community-acquired *E.*  
4  
5 368 *coli* BSI cases based on the Freidman criteria. We ascertained asthma status by applying  
6  
7  
8 369 predetermined criteria independent of a physician diagnosis of asthma or ICD-9 code. Also, our  
9  
10 370 study has inherent limitations as a retrospective study. We could not obtain detail information on  
11  
12 371 certain variables such as atopic sensitization data or smoking history (e.g., duration or the  
13  
14 372 number of cigarettes a day) but we assumed this data to be missing at random (i.e., it is subject to  
15  
16 373 non-differential misclassification bias for comparison groups of interest). Although our criteria  
17  
18 374 for asthma was based on medical record review, given the absence of gold standard for asthma,  
19  
20 375 the retrospective investigation for feasibility (due to infrequent *E coli* BSI), and the extensive use  
21  
22 376 of the criteria in previous asthma research, we believe the criteria is unlikely to result in a  
23  
24 377 significant bias affecting interpretation of the results. Our study finding that asthma prevalence  
25  
26 378 among controls was similar to that at the national level should mitigate this concern. Our study  
27  
28 379 subjects were predominantly white which might limit generalizability of our results to other  
29  
30 380 ethnic groups. Our study subjects were relatively an older population affected by many  
31  
32 381 comorbid conditions, which might confound the study results. Therefore, we adjusted the  
33  
34 382 association between asthma and risk of *E coli* BSI for each comorbid condition individually in  
35  
36 383 our multivariate model. Since the prevalence of comorbid conditions is related to age, we  
37  
38 384 examined the effect of the interaction between age and asthma. We found that the main results  
39  
40 385 on the association between asthma and risk of *E coli* BSI did not appear to be significantly  
41  
42 386 affected by various cutoffs of age suggesting the results did not differ by age group (younger vs.  
43  
44 387 older group).  
45  
46  
47  
48  
49  
50  
51  
52  
53  
54  
55  
56  
57  
58  
59  
60

DW Bang et al

1  
2  
3 388 In conclusion, asthmatics might be at an increased risk of non-respiratory tract bacterial  
4  
5 389 infections, including community-acquired *E. coli* BSI. The mechanisms responsible for this  
6  
7  
8 390 association are yet to be defined while additional investigations replicate our study findings.  
9

10 391

11  
12  
13 392 **Acknowledgement**

14  
15 393 We thank the staff of the Pediatric Asthma Epidemiology Research Unit for their comments and  
16  
17 394 suggestions. We also thank Elizabeth Krusemark for administrative assistance. This work was  
18  
19  
20 395 supported by the Clinician Scholarly Award from the Mayo foundation and by the Rochester  
21  
22 396 Epidemiology Project (R01-AG34676) from the National Institute on Aging. The sponsor of the  
23  
24 397 study had no role in study design, data collection, data analysis, data interpretation, or writing of  
25  
26 398 the report.  
27  
28

29 399

30 400

31 401

32 402

33 403

34 404

35 405

36 406

37 407

38 408

39 409

40 410

DW Bang et al

1  
2  
3 411  
4  
5  
6 412  
7  
8 413  
9  
10 414  
11  
12  
13 415  
14  
15 416  
16  
17  
18 417  
19  
20 418  
21  
22 419  
23  
24 420  
25  
26  
27 421  
28 422  
29 423  
30 424  
31 425  
32 426  
33 427  
34 428  
35 429  
36 430  
37 431  
38 432  
39 433  
40 434  
41 435  
42 436  
43 437  
44 438  
45 439  
46 440  
47 441  
48 442  
49 443  
50 444  
51 445  
52 446  
53  
54  
55  
56  
57  
58  
59  
60

## References

1. Eder W, and Ege MJ, and von Mutius E. The Asthma Epidemic. *New England Journal of Medicine*. 2006;355(21 %R doi:10.1056/NEJMra054308):2226-35.
2. Barnett SB, TA. N. Costs of asthma in the United States: 2002-2007. *J Allergy Clin Immunol* 2011;127(1):145-52.
3. The Center for Disease Control and Prevention. Vital signs: asthma prevalence, disease characteristics, and self-management education --- United States, 2001--2009. *MMWR Morb Mortal Wkly Rep*. 2011;60(17):547-52. Epub 2011/05/06.
4. Bernsen RM, van der Wouden JC, Nagelkerke NJ, JC. dj. Early life circumstances and atopic disorders in childhood. *Clinical & Experimental Allergy*. 2006;36(7):858-65.
5. Capili CR, Hettinger A, Rigelman-Hedberg N, Fink L, Boyce T, Lahr B, et al. Increased risk of pertussis in patients with asthma. *J Allergy Clin Immunol*. 2012;129(4):957-63. Epub 2011/12/31.
6. Juhn YJ, Kita H, Yawn BP, Boyce TG, Yoo KH, McGree ME, et al. Increased risk of serious pneumococcal disease in patients with asthma. *Journal of Allergy and Clinical Immunology*. 2008;122(4):719-23.
7. Jung JA, Kita H, Yawn BP, Boyce TG, Yoo KH, McGree ME, et al. Increased risk of serious pneumococcal disease in patients with atopic conditions other than asthma. *J Allergy Clin Immunol*. 2010;125(1):217-21.
8. Klemets P, Lyytikainen O, Ruutu P, Ollgren J, Kaijalainen T, Leinonen M, et al. Risk of invasive pneumococcal infections among working age adults with asthma. *Thorax*. 2010;65(8):698-702. Epub 2010/08/06.
9. Pilishvili T, Zell ER, Farley MM, Schaffner W, Lynfield R, Nyquist AC, et al. Risk factors for invasive pneumococcal disease in children in the era of conjugate vaccine use. *Pediatrics*. 2010;126(1):e9-17.
10. Talbot TR, Hartert TV, Mitchel E, Halasa NB, Arbogast PG, Poehling KA, et al. Asthma as a risk factor for invasive pneumococcal disease. *N Engl J Med*. 2005;352(20):2082-90.

DW Bang et al

11. Habibzay M, Saldana JI, Goulding J, Lloyd CM, Hussell T. Altered regulation of Toll-like receptor responses impairs antibacterial immunity in the allergic lung. *Mucosal Immunol.* 2012;5(5):524-34. Epub 2012/05/03.
12. Jung J, Kita H, Nahm M, Tsigrelis C, Baddour L, Jacobson R, et al. Influence of asthma status on serotype specific antibody pneumococcal antibody levels. *Postgraduate Medicine.* 2010;122(5):116-24.
13. Contoli M, Message SD, Laza-Stanca V, Edwards MR, Wark PA, Bartlett NW, et al. Role of deficient type III interferon-lambda production in asthma exacerbations. *Nat Med.* 2006;12(9):1023-6.
14. Wark PA, Johnston SL, Bucchieri F, Powell R, Puddicombe S, Laza-Stanca V, et al. Asthmatic bronchial epithelial cells have a deficient innate immune response to infection with rhinovirus. *Journal of Experimental Medicine.* 2005;201(6):937-47. Epub 2005/03/23.
15. Message SD, Laza-Stanca V, Mallia P, Parker HL, Zhu J, Kebabdz T, et al. Rhinovirus-induced lower respiratory illness is increased in asthma and related to virus load and Th1/2 cytokine and IL-10 production. *Proc Natl Acad Sci U S A.* 2008;105(36):13562-7. Epub 2008/09/05.
16. Laza-Stanca V, Message SD, Edwards MR, Parker HL, Zdrenghea MT, Kebabdz T, et al. The Role of IL-15 Deficiency in the Pathogenesis of Virus-Induced Asthma Exacerbations. *PLoS Pathog.* 2011;7(7):e1002114.
17. Plummeridge MJ, Armstrong L, Birchall MA, Millar AB. Reduced production of interleukin 12 by interferon  $\gamma$  primed alveolar macrophages from atopic asthmatic subjects. *Thorax.* 2000;55(10):842-7.
18. Ho C-Y, Wong C-K, Ko FW-S, Chan CH-S, Ho AS-S, Hui DS-C, et al. Apoptosis and b-cell lymphoma-2 of peripheral blood t lymphocytes and soluble fas in patients with allergic asthma\*. *CHEST Journal.* 2002;122(5):1751-8.
19. Al-Hasan MN, Lahr BD, Eckel-Passow JE, Baddour LM. Antimicrobial resistance trends of Escherichia coli bloodstream isolates: a population-based study, 1998-2007. *Journal of Antimicrobial Chemotherapy.* 2009;64(1):169-74.
20. Cheong Hs Fau - Kang C-I, Kang Ci Fau - Kwon KT, Kwon Kt Fau - Heo ST, Heo St Fau - Wi YM, Wi Ym Fau - Kim ES, Kim Es Fau - Lee JS, et al. Clinical significance of healthcare-associated infections in community-onset Escherichia coli bacteraemia. (0305-7453 (Print)).
21. St. Sauver JL, Grossardt BR, Yawn BP, Melton LJ, Rocca WA. Use of a Medical Records Linkage System to Enumerate a Dynamic Population Over Time: The Rochester Epidemiology Project. *American Journal of Epidemiology.* 2011;173(9):1059-68.
22. Kurland LT, Molgaard CA. The patient record in epidemiology. *Sci Am.* 1981;245(4):54-63. Epub 1981/10/01.
23. Broder I, Higgins MW, Mathews KP, Keller JB. Epidemiology of asthma and allergic rhinitis in a total community, Tecumseh, Michigan: III. Second survey of the community. *J Allergy Clin Immunol.* 1974;53(3):127-38.
24. Friedman ND, Kaye KS, Stout JE, McGarry SA, Trivette SL, Briggs JP, et al. Health care--associated bloodstream infections in adults: a reason to change the accepted definition of community-acquired infections. *Ann Intern Med.* 2002;137(10):791-7.
25. Yunginger JW, Reed CE, O'Connell EJ, Melton LJ, 3rd, O'Fallon WM, Silverstein MD. A community-based study of the epidemiology of asthma. Incidence rates, 1964-1983. *Am Rev Respir Dis.* 1992;146(4):888-94. Epub 1992/10/01.

DW Bang et al

- 1  
2  
3 493 26. Silverstein MD, Reed CE, O'Connell EJ, Melton LJ, 3rd, O'Fallon WM, Yunginger JW.  
4 494 Long-term survival of a cohort of community residents with asthma. *N Engl J Med*.  
5 495 1994;331(23):1537-41. Epub 1994/12/08.  
6 496 27. Bauer BA, Reed CE, Yunginger JW, Wollan PC, Silverstein MD. Incidence and  
7 497 outcomes of asthma in the elderly. A population-based study in Rochester, Minnesota.  
8 498 *Chest*. 1997;111(2):303-10. Epub 1997/02/01.  
9 499 28. Juhn YJ, Qin R, Urm S, Katusic S, Vargas-Chanes D. The influence of neighborhood  
10 500 environment on the incidence of childhood asthma: a propensity score approach. *J Allergy*  
11 501 *Clin Immunol*. 2010;125(4):838-43 e2. Epub 2010/03/20.  
12 502 29. Juhn YJ, Sauver JS, Katusic S, Vargas D, Weaver A, Yunginger J. The influence of  
13 503 neighborhood environment on the incidence of childhood asthma: a multilevel approach.  
14 504 *Social science & medicine*. 2005;60(11):2453-64. Epub 2005/04/09.  
15 505 30. Yawn BP, Yunginger JW, Wollan PC, Reed CE, Silverstein MD, Harris AG. Allergic  
16 506 rhinitis in Rochester, Minnesota residents with asthma: frequency and impact on health  
17 507 care charges. *J Allergy Clin Immunol*. 1999;103(1 Pt 1):54-9. Epub 1999/01/20.  
18 508 31. Yunginger J, Reed, CE, O'Connell, EJ, Melton, J, O'Fallon, WM, Silverstein, MD. A  
19 509 Community-based Study of the Epidemiology of Asthma: Incidence Rates, 1964-1983. *Am*  
20 510 *Rev Respir Dis*. 1992;146:888-94.  
21 511 32. Javed A, Yoo KH, Jacobson RM, Poland GA, Juhn YJ. Characteristics of Children with  
22 512 Asthma who Achieved Remission of Asthma. *Journal of Asthma*. 2013;Epub ahead of  
23 513 print(doi:10.3109/02770903.2013.787625).  
24 514 33. Greenland S. Modeling and variable selection in epidemiologic analysis. *Am J Public*  
25 515 *Health*. 1989;79:340-9.  
26 516 34. Miettinen OS. Proportion of disease caused or prevented by a given exposure, trait  
27 517 or intervention. *American Journal of Epidemiology*. 1974;99(5):325-32.  
28 518 35. O'Byrne PM, Pedersen S, Carlsson L-G, Radner F, Thoren A, Peterson S, et al. Risks of  
29 519 Pneumonia in Patients with Asthma Taking Inhaled Corticosteroids. *Am J Respir Crit Care*  
30 520 *Med*. 2011;183(5):589-95.  
31 521 36. The Center for Disease Control and Prevention. Prevalence of Coronary Heart  
32 522 Disease: United States, 2006-2010. *MMWR*. 2011;60(40):1377-81.  
33 523 37. Jackson LA, Benson P, Neuzil KM, Grandjean M, Marino JL. Burden of community-  
34 524 onset *Escherichia coli* bacteremia in seniors. *J Infect Dis*. 2005;191(9):1523-9.  
35 525 38. Laupland KB GD, Church DL, Ross T, Pitout JD,. Incidence, Risk Factors and  
36 526 Outcomes of *Escherichia coli* Blood Stream Infections in a Large Canadian Region. *Clin*  
37 527 *Microbiol Infect*. 2008;14:1041-7.  
38 528 39. Sykes A, Edwards MR, Macintyre J, Del Rosario A, Bakhsoliani E, Trujillo-Torralbo  
39 529 MB, et al. Rhinovirus 16-induced IFN-alpha and IFN-beta are deficient in bronchoalveolar  
40 530 lavage cells in asthmatic patients. *J Allergy Clin Immunol*.129(6):1506-14 e6.  
41 531 40. Wang L, Zhao L, Lv J, Yin Q, Liang X, Chu Y, et al. BLT1-dependent Alveolar  
42 532 Recruitment of CD4+CD25+ Foxp3+ Regulatory T Cells Is Important for Resolution of Acute  
43 533 Lung Injury. *Am J Respir Crit Care Med*. 2012;186(10):989-98.  
44 534 41. Robinson DS. Regulatory T cells and asthma. *Clin Exp Allergy*. 2009;39(9):1314-23.  
45 535 42. Koch A, Knobloch J, Dammhayn C, Raidl M, Ruppert A, Hag H, et al. Effect of bacterial  
46 536 endotoxin LPS on expression of INF-gamma and IL-5 in T-lymphocytes from asthmatics.  
47 537 *Clin Immunol*. 2007;125(2):194-204. Epub 2007/09/22.  
48 538

DW Bang et al

1  
2  
3 539  
4  
5  
6 540  
7  
8 541  
9  
10 542  
11  
12  
13 543  
14  
15 544  
16  
17 545  
18  
19  
20 546  
21  
22 547

Table 1. Definition of asthma

---

Patients were considered to have *definite* asthma if a physician had made a diagnosis of asthma with the first two conditions and/or if each of the following three conditions were present, and they were considered to have *probable* asthma if only the first two conditions were present:

1. History of cough with wheezing, and/or dyspnea, OR history of cough and/or dyspnea plus wheezing on examination,
2. Substantial variability in symptoms from time to time or periods of weeks or more when symptoms were absent, and
3. Two or more of the following:
  - Sleep disturbance by nocturnal cough and wheeze
  - Nonsmoker (14 years or older)
  - Nasal polyps
  - Blood eosinophilia higher than 300/uL
  - Positive wheal and flare skin tests OR elevated serum IgE
  - History of hay fever or infantile eczema OR cough, dyspnea, and wheezing regularly on exposure to an antigen
  - Pulmonary function tests showing one FEV<sub>1</sub> or FVC less than 70% predicted and another with at least 20% improvement to an FEV<sub>1</sub> of higher 70% predicted OR methacholine challenge test showing 20% or greater decrease in FEV<sub>1</sub>
  - Favorable clinical response to bronchodilator (e.g., documented improvement of respiratory symptoms or FEV<sub>1</sub> in spirometry after bronchodilator therapy)

Patients were excluded from the study if any of these conditions were present:

- Tracheobronchial foreign body at or about the incidence date
  - Hypogammaglobulinemia (IgG less than 2.0 mg/mL) or other immunodeficiency disorder
  - Wheezing occurring only in response to anesthesia or medications
  - Bullous emphysema or pulmonary fibrosis on chest radiograph
  - PiZZ alpha<sub>1</sub>-antitrypsin
  - Cystic fibrosis
  - Other major chest disease such as juvenile kyphoscoliosis or bronchiectasis
- FVC forced vital capacity; FEV<sub>1</sub>, forced expiratory volume in 1 sec.
-

DW Bang et al

- 
- Pulmonary function tests that showed FEV<sub>1</sub> to be consistently below 50% predicted or diminished diffusion capacity

For peer review only

1  
2  
3  
4  
5  
6  
7  
8  
9  
10  
11  
12  
13  
14  
15  
16  
17  
18  
19  
20  
21  
22  
23  
24  
25  
26  
27  
28  
29  
30  
31  
32  
33  
34  
35  
36  
37  
38  
39  
40  
41  
42  
43  
44  
45  
46  
47  
48  
49  
50  
51  
52  
53  
54  
55  
56  
57  
58  
59  
60

548  
549  
550  
551  
552  
553  
554  
555  
556  
557

---

Table 2. Sociodemographic, and clinical characteristics of patients with *Escherichia coli* blood stream infection and their matched control subjects



DW Bang et al

| Characteristics                                  | Case<br>(n= 259) | Control<br>(n= 259) | Unadjusted OR <sup>a</sup><br>(95% CI) | p value |
|--------------------------------------------------|------------------|---------------------|----------------------------------------|---------|
| Age (years)                                      | 61±22            | 61±22               | 1.14 (0.78, 1.67)                      | 0.497   |
| Female gender                                    | 179 (69%)        | 179 (69%)           | -                                      |         |
| Ethnicity                                        |                  |                     |                                        | <0.001  |
| Caucasian (non-Hispanic)                         | 222 (86%)        | 245 (95%)           | Referent                               |         |
| Other                                            | 37 (14%)         | 14 (5%)             | 4.83 (2.01, 11.64)                     |         |
| Education status                                 |                  |                     |                                        | 0.004   |
| Some high school or less                         | 45 (17%)         | 21 (8%)             | Referent                               |         |
| High school graduate                             | 95 (37%)         | 87 (34%)            | 0.50 (0.27, 0.93)                      |         |
| Some college or more                             | 110 (42%)        | 143 (55%)           | 0.33 (0.18, 0.62)                      |         |
| Unknown                                          | 9 (3%)           | 8 (3%)              | -                                      |         |
| Influenza vaccination 1 year prior to index date | 95 (37%)         | 110 (42%)           | 0.75 (0.51, 1.10)                      | 0.145   |
| PPV23 prior to index date                        | 117 (45%)        | 114 (44%)           | 1.08 (0.69, 1.68)                      | 0.736   |
| Food allergy                                     | 16 (6%)          | 6 (2%)              | 2.67 (1.04, 6.81)                      | 0.040   |
| Asthma                                           | 37 (14%)         | 16 (6%)             | 2.75 (1.42, 5.32)                      | 0.003   |
| High-risk conditions                             |                  |                     |                                        |         |
| Alcohol addiction                                | 17 (7%)          | 1 (0%)              | 17.00 (2.26, 127.75)                   | 0.006   |
| Autoimmune disease <sup>c</sup>                  | 9 (3%)           | 3 (1%)              | 3.00 (0.81, 11.08)                     | 0.099   |
| Chronic obstructive lung disease                 | 12 (5%)          | 9 (3%)              | 1.37 (0.55, 3.42)                      | 0.493   |
| Chronic renal insufficiency                      | 30 (12%)         | 4 (2%)              | 9.67 (2.94, 31.73)                     | <0.001  |
| Congestive heart failure                         | 19 (7%)          | 2 (1%)              | 18.00 (2.40, 134.84)                   | 0.005   |
| Coronary artery disease                          | 52 (20%)         | 40 (15%)            | 1.46 (0.89, 2.41)                      | 0.136   |
| Dementia                                         | 16 (6%)          | 7 (3%)              | 3.25 (1.06, 9.97)                      | 0.039   |
| Diabetes mellitus                                | 50 (19%)         | 24 (9%)             | 2.53 (1.44, 4.43)                      | 0.001   |
| History of stroke                                | 15 (6%)          | 10 (4%)             | 1.71 (0.67, 4.35)                      | 0.257   |
| Immobilization <sup>d</sup>                      | 10 (4%)          | 1 (0%)              | 10.00 (1.28, 78.12)                    | 0.028   |
| Immunosuppressive therapy                        | 25 (10%)         | 4 (2%)              | 8.00 (2.41, 26.57)                     | 0.001   |
| Malignancy                                       | 21 (8%)          | 12 (5%)             | 2.00 (0.90, 4.45)                      | 0.090   |
| Recurrent urinary tract infection                | 29 (11%)         | 2 (1%)              | 14.50 (3.46, 60.77)                    | <0.001  |
| Transplant recipients                            | 8(3%)            | 0 (0%)              | -                                      |         |
| Urinary incontinence                             | 46 (18%)         | 20 (8%)             | 2.86 (1.55, 5.25)                      | 0.001   |
| Other condition <sup>e</sup>                     | 14 (5%)          | 0 (0%)              | -                                      | -       |
| Smoke                                            |                  |                     |                                        | 0.058   |
| No (including ex-smoker)                         | 206 (80%)        | 222 (86%)           | Referent                               |         |



DW Bang et al

Active 53 (20%) 37 (14%) 1.59 (0.98, 2.58)

<sup>a</sup> Odds ratio based on matched analysis taking into account gender, birthday, residency, and follow-up duration

<sup>b</sup> Comorbidity conditions are not mutually exclusive

<sup>c</sup> Autoimmune disease includes SLE, rheumatoid arthritis, inflammatory bowel disease and other autoimmune diseases

<sup>d</sup> Immobilization includes hemi/para/quadri-plegia

<sup>e</sup> Other conditions include use of urinary catheter, device, genitourinary procedures (e.g., prostate biopsy), and congenital anomaly

Table 3. A multivariable conditional logistic regression model for the association between asthma and risk of community-acquired *Escherichia coli* bloodstream infection

| Characteristics | Case<br>(n= 259) | Control<br>(n= 259) | Adjusted OR <sup>a</sup> (95% CI) | p value |
|-----------------|------------------|---------------------|-----------------------------------|---------|
|-----------------|------------------|---------------------|-----------------------------------|---------|

DW Bang et al

|                                                  |           |           |                      |       |
|--------------------------------------------------|-----------|-----------|----------------------|-------|
| Ethnicity                                        |           |           |                      | 0.003 |
| Caucasian (non-Hispanic)                         | 222 (86%) | 245 (95%) | Referent             |       |
| Other                                            | 37 (14%)  | 14 (5%)   | 5.90 (1.85, 18.84)   |       |
| Education status                                 |           |           |                      | 0.646 |
| Some high school or less                         | 45 (17%)  | 21 (8%)   | Referent             |       |
| High school graduate                             | 95 (37%)  | 87 (34%)  | 0.89 (0.37, 2.14)    |       |
| Some college or more                             | 110 (42%) | 143 (55%) | 0.65 (0.28, 1.50)    |       |
| Unknown                                          | 9 (3%)    | 8 (3%)    | -                    |       |
| Influenza vaccination 1 year prior to index date | 95 (37%)  | 110 (42%) | 0.58 (0.33, 1.02)    | 0.058 |
| Food allergy                                     | 16 (6%)   | 6 (2%)    | 3.51 (0.94, 13.11)   | 0.062 |
| Asthma                                           | 37 (14%)  | 16 (6%)   | 2.74 (1.11, 6.76)    | 0.029 |
| Active smoking                                   | 53 (20%)  | 37 (14%)  | 1.31 (0.69, 2.47)    | 0.412 |
| High-risk conditions                             |           |           |                      |       |
| Alcohol addiction                                | 17 (7%)   | 1 (0%)    | 32.31 (1.91, 546.18) | 0.016 |
| Autoimmune diseases                              | 9 (3%)    | 3 (1%)    | 1.79 (0.23, 13.72)   | 0.574 |
| Chronic renal insufficiency                      | 30 (12%)  | 4 (2%)    | 4.76 (1.16, 19.59)   | 0.030 |
| Congestive heart failure                         | 19 (7%)   | 2 (1%)    | 9.86 (0.93, 104.59)  | 0.058 |
| Coronary artery disease                          | 52 (20%)  | 40 (15%)  | 0.81 (0.37, 1.77)    | 0.593 |
| Dementia                                         | 16 (6%)   | 7 (3%)    | 4.14 (0.96, 17.96)   | 0.057 |
| Diabetes mellitus                                | 50 (19%)  | 24 (9%)   | 2.39 (0.97, 5.87)    | 0.057 |
| Immobilization                                   | 10 (4%)   | 1 (0%)    | 39.86 (2.30, 690.42) | 0.011 |
| Immunosuppressive therapy                        | 25 (10%)  | 4 (2%)    | 8.51 (1.32, 54.96)   | 0.024 |
| Malignancy                                       | 21 (8%)   | 12 (5%)   | 2.18 (0.59, 8.11)    | 0.243 |
| Recurrent urinary tract infection                | 29 (11%)  | 2 (1%)    | 13.54 (2.42, 75.65)  | 0.003 |
| Urinary incontinence                             | 46 (18%)  | 20 (8%)   | 2.57 (1.05, 6.26)    | 0.038 |

<sup>a</sup> Adjusted variables included all variables included in this table.

Table 4. Association of asthma control status and therapy with risk of community-acquired *Escherichia coli* bloodstream infection

| Asthma characteristics | Total | Unadjusted OR | Adjusted OR <sup>a</sup> |
|------------------------|-------|---------------|--------------------------|
|------------------------|-------|---------------|--------------------------|

DW Bang et al

|                                      | (n=518)   | (95% CI), p-value            | (95% CI), p-value            |
|--------------------------------------|-----------|------------------------------|------------------------------|
| Inhaled corticosteroid therapy (ICS) |           | <i>p</i> =0.009 <sup>b</sup> | <i>p</i> =0.079 <sup>b</sup> |
| No asthma                            | 465 (90%) | Referent                     | Referent                     |
| Asthma without ICS                   | 35 (7%)   | 1.90 (0.88, 4.09)            | 1.99 (0.67, 5.94)            |
| Asthma with ICS                      | 18 (3%)   | 7.00 (1.59, 30.80)           | 5.33 (0.90, 31.66)           |
| Asthma status <sup>c</sup>           |           | <i>p</i> =0.005 <sup>b</sup> | <i>p</i> =0.067 <sup>b</sup> |
| No asthma                            | 465 (90%) | Referent                     | Referent                     |
| Remission or inactive asthma         | 17 (3%)   | 1.25 (0.45, 3.50)            | 1.25 (0.25, 6.30)            |
| Active or current asthma             | 36 (7%)   | 4.37 (1.80, 10.62)           | 3.89 (1.23, 12.28)           |

<sup>a</sup> Adjusted variables included all factors reported in the multivariable model (see Table 3) except for dichotomous asthma status

<sup>b</sup> P-value for overall comparison

<sup>c</sup> Active or current asthma was defined as the presence of asthma-related events including asthma symptoms, or use of asthma medications, and outpatient/emergency department/hospitalization for asthma within one year prior to index date of E coli BSI; Remission of asthma was defined as the absence of asthma-related events > 3 years prior to index date; Inactive (not current) asthma was defined as the presence of asthma-related events within 1-3 years prior to index date.

DW Bang et al

1 TITLE PAGE

2 Original Article

3 **Asthma and Risk of Non-Respiratory Tract Infection: A Population-Based Case Control**

4 **Study**

5  
6 Duk Won Bang, MD<sup>a,b</sup>, Hyeon J. Yang, MD<sup>c</sup>, Eell Ryoo, MD<sup>a,d</sup>, Majdi N. Al-Hasan, MD<sup>e</sup>,  
7 Brian Lahr, MS,<sup>f</sup> Larry M. Baddour, MD<sup>g</sup>, Barbara P. Yawn, MD<sup>h</sup>, and Young J. Juhn, MD<sup>a,i</sup>

8  
9 <sup>a</sup>Department of Pediatric and Adolescent Medicine, Mayo Clinic, Rochester, MN

10 <sup>b</sup>Department of Internal Medicine, Soonchunhyang University Hospital, Seoul, South Korea

11 <sup>c</sup>Department of Pediatrics, Soonchunhyang University Hospital, Seoul, South Korea

12 <sup>d</sup>Department of Pediatrics, Gil Hospital, Gachon University School of Medicine, Incheon, South  
13 Korea

14 <sup>e</sup>Department of Medicine, University of Kentucky Medical Center, Lexington, KY

15 <sup>f</sup>Division of Biomedical Statistics and Informatics, Mayo Clinic, Rochester, MN

16 <sup>g</sup>Department of Medicine, Mayo Clinic, Rochester, MN

17 <sup>h</sup>Department of Research, Olmsted Medical Center, Rochester, MN

18 <sup>i</sup>Department of Internal Medicine, Mayo Clinic, Rochester, MN

19 **Corresponding author**

20 Young J. Juhn, M.D., M.P.H

21 Division of Community Pediatric and Adolescent Medicine

22 Department of Pediatric and Adolescent Medicine/Internal Medicine

23 Mayo Clinic

DW Bang et al

24 200 1<sup>st</sup> Street SW

25 Rochester, MN 55905

26 TEL: 507-538-1642

27 FAX: 507-284-9744

28 E-mail: juhn.young@mayo.edu

29

30 Funding: This work was supported by the Clinician Scholarly Award from the Mayo foundation  
31 and a grant from the National Institute of Allergy and Infectious Diseases (R21 AI101277). It  
32 was also supported by the Rochester Epidemiology Project (R01-AG34676) from the National  
33 Institute on Aging.

34

35 Conflict of interest: The study investigators have nothing to disclose that poses a conflict of  
36 interest.

37

38 We reviewed the STROBE statement and addressed all items in that checklist and are  
39 submitting the STROBE statement with the revised manuscript.

40

41 Key Words: Asthma, Risk, Epidemiology, Community-acquired infections, *Escherichia Coli*,  
42 Blood stream infection, genitourinary, and gastrointestinal tract

43 Abbreviations: BSI: blood stream infection, *E.Coli*: *Escherichia Coli*, TLR : Toll-like Receptor,

44 ICS : inhaled corticosteroid, PPV23: 23-valent pneumococcal polysaccharide vaccine

45 Word count: 2993

DW Bang et al

46 Article summary

47 1. Article focus: We addressed the following question in this study.

48 - Given the association between asthma and airway-related infection, is asthma also associated  
49 with non-airway-related serious infections such as *Escherichia coli* blood stream infection?

50 2. Key messages

51 - Individuals with asthma are at a significantly increased risk of non-airway-related infection,  
52 including community-acquired *E. coli* blood stream infection.

53 - The impact of asthma on risks of microbial infections may go beyond airways.

54 - Clinicians and patients should be aware of the association and recognize the risk of subsequent  
55 infection.

56 3. Strength and limitations

57 - This is the first population-based case-control study using predetermined criteria for asthma  
58 status and community-acquired *Escherichia coli* blood stream infection.

59 - The main limitation of the study is inherent limitations as a retrospective study and the study  
60 subjects were predominantly white.

61 Contributors

62 BDW collected data, interpreted the results, and drafted the manuscript; HJY participated in the  
63 study design, interpreted the results and reviewed the manuscript; ER collected data, interpreted  
64 the results, and reviewed manuscript; MNA assembled the original dataset for the *E. coli* BSI  
65 study, collected the original data, interpreted the results, and reviewed the manuscript; LMB  
66 participated in the study design, interpreted the results, and reviewed the manuscript; BPY  
67 participated in the study design, interpreted the results, and reviewed manuscript; and YJJ  
68 participated in the study design, interpreted the results, and reviewed manuscript; and YJJ

DW Bang et al

1  
2  
3  
4  
5  
6  
7  
8  
9  
10  
11  
12  
13  
14  
15  
16  
17  
18  
19  
20  
21  
22  
23  
24  
25  
26  
27  
28  
29  
30  
31  
32  
33  
34  
35  
36  
37  
38  
39  
40  
41  
42  
43  
44  
45  
46  
47  
48  
49  
50  
51  
52  
53  
54  
55  
56  
57  
58  
59  
60

69 participated in the study design, performed data analysis, interpreted the results, and drafted the  
70 manuscript. BDW, ER, and YJJ had full access to data. All authors reviewed and approved the  
71 paper.

72 There will be no additional data available.

For peer review only

DW Bang et al

1  
2  
3 **92 Abstract:**  
4

5  
6 **93 Objectives:** Asthmatics have increased risks of airway-related infections. Little is known about  
7  
8 **94** whether this is true for non-airway-related serious infections such as *Escherichia coli* blood  
9  
10 **95** stream infection (BSI). We assessed whether asthma is associated with a risk of developing  
11  
12 **96** community-acquired *E. coli* BSI.  
13

14  
15 **97 Design:** The study was designed as a population-based retrospective case-control study.  
16

17  
18 **98 Setting:** This population-based study was conducted in Olmsted County, Minnesota.  
19

20 **99 Participants:** The study included 259 all eligible community-acquired *E. coli* BSI cases in  
21  
22 **100** Olmsted County, MN between 1998 and 2007 and 259 birthday-, gender-, and residency-  
23  
24 **101** matched controls.  
25

26  
27 **102 Primary and secondary outcome measures:** Only community-acquired *E. coli* BSI cases as the  
28  
29 **103** primary outcome was included. Asthma status as an exposure was ascertained by predetermined  
30  
31 **104** criteria. An adjusted odds ratio (OR) and 95% confidence interval (CI) for the association  
32  
33 **105** between asthma and risk of community-acquired *E. coli* BSI was calculated using conditional  
34  
35 **106** logistic regression.  
36  
37

38  
39 **107 Results:** Of 259 eligible cases, 179 (69 %) were female and mean age was 61±22 years. Thirty-  
40  
41 **108** seven of 259 cases (14%) and 16 of 259 controls (6%) had a prior history of asthma (adjusted  
42  
43 **109** OR: 2.74; 95% CI: 1.11-6.76; p=0.029). The population attributable risk of asthma for  
44  
45 **110** community-acquired *E. coli* BSI was 9%. Although not statistically significant, there was a  
46  
47 **111** borderline association between having a history of food allergy and increased risk of community-  
48  
49 **112** acquired *E. coli* BSI (6% vs 2%; adjusted OR: 3.51; 95% CI: 0.94-13.11, p=0.062).  
50  
51

52  
53 **113 Conclusions:** Based on the findings of the current population-based, case-control investigation, a  
54  
55 **114** history of asthma may be associated with risk of community-acquired *E. coli* BSI. The impact of  
56  
57  
58  
59  
60



DW Bang et al

115 asthma on risk of microbial infections may go beyond airways.

116

117 **Abstract Word Count:** 246

## 118 INTRODUCTION

119 Asthma is the most common chronic illness in childhood and is a major cause of  
120 morbidity in adults, affecting 4-17% of children and 7.7% of adults in the US.(1-3)] About 300  
121 million people globally are estimated to be affected by asthma.(4)

122 Previous studies showed increased risks of microbial infections among individuals with  
123 asthma(5-10) and the population attributable risk for asthma of serious pneumococcal disease  
124 was 11-17%.(6, 10) Impaired innate and adaptive immune functions among asthmatics have  
125 been suggested for potential underlying mechanisms.(11-18) These study results are based on  
126 microbial infections of the airways. However, little is known about whether asthma status is  
127 associated with risk of non-airway-related bacterial infections such as community-acquired  
128 *Escherichia coli* blood stream infection (BSI).

129 Addressing this question should provide an important insight into the nature of the impact  
130 of asthma status on susceptibility to microbial infection. Specifically, it will improve our  
131 understanding on whether the impact of asthma status on susceptibility to infection goes beyond  
132 airways. In investigating this question, community-acquired *E. coli* BSI is suitable because it is  
133 not an airway-related infection but genitourinary tract/gastrointestinal origin, *E. coli* is a gram-  
134 negative bacterium with Toll-like Receptor (TLR)-4-mediated signal transduction for innate  
135 immunity, and *E. coli* is the most common cause of community-acquired BSI.(19) Up to 30% of  
136 individuals who developed community-acquired *E. coli* BSI did not have known risk

DW Bang et al

1  
2  
3 137 factors,[<sup>(20)</sup>] suggesting that unrecognized risk factors exist that are associated with the  
4  
5 138 development of community-acquired *E. coli* BSI.  
6  
7

8 139 Investigating the relationship between asthma and non-airway-related serious bacterial  
9  
10 140 infections will advance our understanding on the extent to which asthma impacts susceptibility to  
11  
12 141 microbial infections and whether asthma could be an unrecognized risk factor for non-airway-  
13  
14 142 related bacterial infections.  
15  
16

17 143 We hypothesize that individuals with asthma have an increased risk of community-  
18  
19 144 acquired *E. coli* BSI, as compared to those without asthma. To test this hypothesis, we conducted  
20  
21 145 a population-based retrospective case-control study.  
22  
23  
24  
25  
26  
27  
28  
29  
30  
31  
32  
33  
34  
35  
36  
37  
38  
39  
40  
41  
42  
43  
44  
45  
46  
47  
48  
49  
50  
51  
52  
53  
54  
55  
56  
57  
58  
59  
60

DW Bang et al

160

161

162

163

## 164 **METHODS**

165 The study was approved by the Institutional Review Boards of both Mayo Clinic and

166 Olmsted Medical Center. This study was designed as a population-based case-control study.

### 167 **Study population and setting**

168 Olmsted County, Minnesota is an excellent setting to conduct a population-based  
169 epidemiologic study such as this because medical care is virtually self-contained within the  
170 community (nearly all Olmsted County residents receive medical cares from two medical centers  
171 in the community). The population characteristics of Olmsted County residents are similar to  
172 those of non-Hispanic white.(21) If one grants the authorization for using medical record for  
173 research (almost 95% of Olmsted County residents), each patient is assigned a unique identifier  
174 under the auspices of the Rochester Epidemiology Project (REP).(22) Using REP resources, we  
175 previously demonstrated that incidence rates of asthma for this community are similar to other  
176 communities. The annual incidence rate of asthma in Rochester was 238 cases per 100,000  
177 persons, which is comparable to those in other communities such as Tecumseh, Michigan  
178 (250/100,000).(23)

### 179 **Study subjects: Case ascertainment**

180 To test our study hypothesis, we utilized a population-based incidence parent study,  
181 which previously identified the community-acquired cases to study antimicrobial resistance  
182 trends of *E. coli* BSI in the community. Details of the case ascertainment have been described

DW Bang et al

1  
2  
3 183 previously.(19) Briefly, using the microbiology databases at Mayo Clinic Rochester and Olmsted  
4  
5 184 Medical Center, all eligible children and adults with monomicrobial *E. coli* BSI (n=274) among  
6  
7  
8 185 Olmsted County residents from January 1, 1998 to December 31, 2007 (i.e., a population-based  
9  
10 186 all incident cases of *E. coli* BSI ) were identified based on the criteria suggested by Freidman et  
11  
12 187 al.(24) As *E. coli* BSI is required for inpatient parental treatment, community-acquired *E. coli*  
13  
14 188 BSI was defined by isolation of *E. coli* from blood cultures at the time of hospital admission or  
15  
16 189 within 48 hours after hospital admission for patients who did not fit criteria for health care–  
17  
18 190 associated infection according to the Freidman’s criteria.(24) Medical records of all subjects  
19  
20 191 were reviewed by investigators of the previous study (MNA) to confirm the diagnosis of  
21  
22 192 community-acquired *E. coli* BSI, assess clinical features, and determine the eligibility. Only  
23  
24 193 community-acquired *E. coli* BSI was included because nosocomial and health care-associated *E.*  
25  
26 194 *coli* BSI are unsuitable to address the aim of the present study (clinically, they are a high-risk  
27  
28 195 population for *E. coli* BSI and not representative of the study population). The index date of BSI  
29  
30 196 was defined as the date when blood cultures that eventually grew *E. coli* were obtained.  
31  
32 197 Exclusion criteria for cases (and controls) included: 1) polymicrobial BSI caused by more than  
33  
34 198 one microorganism, 2) blood cultures acquired at autopsy, 3) nosocomial and health care-  
35  
36 199 associated *E. coli* BSI, 4) non-Olmsted County residency at the time of index date of BSI, 5) no  
37  
38 200 research authorization for using medical record for research, and 6) health conditions making  
39  
40 201 ascertainment of asthma difficult listed in Table 1.

#### 202 **Selection of control subjects**

203 Control subjects were randomly selected with 1:1 matching from Olmsted County  
204 residents who had not had a history of *E. coli* BSI at the end of the study period. Briefly, a list of  
205 potential control subjects who had received medical care from either Mayo Clinic or Olmsted

DW Bang et al

1  
2  
3 206 Medical Center and who met the matching criteria was generated and randomly selected from the  
4  
5 207 REP database for the present study. The matching criteria included: 1) gender, 2) birth date  
6  
7  
8 208 (within six months for those <18 years of age and within one year for those > 18 years of age), 3)  
9  
10 209 the same clinic registration year as matched case (within one year), and 4) closest clinic visit to  
11  
12 210 index date of matched case within one year. The index date for control subjects was defined as  
13  
14 211 the closest (within one year) clinic visit date to index date of BSI for their corresponding  
15  
16 212 matched case. Based on the number of cases and controls enrolled in this present study (259  
17  
18 213 pair), assuming 8% of asthma prevalence among controls, this present study had 80% power to  
19  
20 214 detect an effect size of 2.27 of odds ratio (16.5% of asthma in cases). This effect size was  
21  
22 215 smaller than the reported effect sizes for the association between asthma and risk of microbial  
23  
24 216 infection (OR: 2.4-6.7) suggesting adequate statistical power to address the study aim.(6, 10)

25  
26  
27  
28  
29 217 **Exposure ascertainment (asthma status)**

30  
31 218 For determining asthma status of all cases and controls, we conducted comprehensive  
32  
33 219 medical record reviews to apply predetermined criteria for asthma as performed in our previous  
34  
35 220 work.(5, 6) The criteria are delineated in Table 1. These criteria have been extensively used in  
36  
37 221 research for asthma epidemiology and were found to have high reliability.(25-30) We included  
38  
39 222 both definite and probable asthma according to the criteria prior to the index date of BSI cases  
40  
41 223 because most probable asthmatics become definite over time.(6, 31) The incidence dates (the  
42  
43 224 first date when one met the criteria for asthma) for all asthmatic patients were determined; thus,  
44  
45 225 we were able to discern the temporal relationship between asthma status (exposure) and *E coli*  
46  
47 226 BSI (outcome). The risk of *E. coli* BSI was assessed in relation to the current asthma status(32):  
48  
49 227 remission (no asthma symptoms, no asthma-related visits, or no asthma medications for at least  
50  
51 228 three years prior to index date); active or current asthma (presence of clinical symptoms, asthma-  
52  
53  
54  
55  
56  
57  
58  
59  
60

DW Bang et al

229 related visits, or asthma medications within one year prior to index date); and inactive (not  
230 current) asthma (presence of asthma symptoms, asthma-related visits, or asthma medications  
231 within 1-3 years prior to index date).

### 232 **Other variables**

233 Pertinent covariates and confounders were collected from medical records:  
234 sociodemographic variables (age, gender, ethnicity, and educational status), asthma medications  
235 including inhaled and systemic corticosteroids, family history of asthma, atopic status based on  
236 sensitization against aeroallergens and food allergens, smoking status (either active or passive  
237 exposure to tobacco smoke), vaccination status, and co-morbid conditions at the time of index  
238 date as listed in Table 2. The period of data collection was from October 1, 2011 to May 30,  
239 2012.

### 240 **Statistical analysis**

241 Formal comparison of asthma and other suspected risk factors between matched cases  
242 and controls was performed using conditional logistic regression, with community-acquired *E.*  
243 *coli* BSI as the target of prediction. All factors were analyzed for a univariate association with  
244 BSI, and any variables meeting the Greenland entry criteria ( $P < 0.2$ ) were carried forward into a  
245 final multivariable model.(33) Odds ratios (OR) from univariate (unadjusted) and multivariable  
246 (adjusted) models are reported to express the magnitude of association in terms of the likelihood  
247 of being a case. We calculated the population attributable risk percentage (PAR%) of asthma for  
248 community-acquired *E. coli* BSI using the formula established by Miettinen.(34) Statistical  
249 significance was tested at a two-sided alpha error of 0.05. All analyses were carried out with the  
250 statistical software package SAS, version 9.2 (SAS Institute, Cary, NC, USA).

251

DW Bang et al

252

253

254

255

**256 RESULTS****257 Study subjects**

258 Of the 274 patients who were identified in the original study, 259 were eligible for the present  
259 study. Fifteen patients were excluded; five for consistent FEV1 < 50%, two for restrictive lung  
260 disease, two for significant kyphoscoliosis, two for bronchiectasis, one for cystic fibrosis, one for  
261 pulmonary fibrosis, and two due to non-Olmsted County residency. Of the eligible 259 cases,  
262 179 (69%) were female, 249 (96%) were 18 years of age or older (age mean±standard deviation,  
263 61±22 years), and 222 (86%) were Caucasian. The characteristics of the cases and their matched  
264 controls, and the individual associations with community-acquired *E. coli* BSI, are summarized  
265 in Table 2. There were only 10 asthmatics on moderate- or high-dose inhaled corticosteroid (ICS)  
266 and two asthmatics on systemic corticosteroid at the time of the index date. Comparing subjects  
267 with asthma versus those without, there was no significant difference in the proportions, who had  
268 received influenza vaccine (40% vs. 40%, p=0.99) or PPV23 (49% vs. 44%, p=0.49) within one  
269 year prior to index date.

**270 Association between asthma and risk of community-acquired *E. coli* BSI**

271 Thirty-seven of 259 (14%) cases had a history of asthma prior to the index date of community-  
272 acquired *E. coli* BSI, compared with 16 of 259 (6%) controls (unadjusted OR: 2.75; 95% CI:  
273 1.42-5.32; p=0.003). Of the 37 case subjects with asthma, 33 (89%) had definite asthma and 4  
274 (11%) had probable asthma. Of the 16 controls with asthma, 12 (75%) had definite asthma and 4

DW Bang et al

1  
2  
3 275 (25%) had probable asthma. Among all 53 asthmatics, 18 were on ICS therapy at the index date  
4  
5  
6 276 (8 on low-dose ICS and 10 on moderate to high-dose ICS therapy). The effect of asthma on risk  
7  
8 277 of community-acquired *E. coli* BSI, independent of other risk factors, is summarized in Table 3.  
9  
10 278 Subjects with a history of asthma by predetermined criteria for asthma in Table 1 had a nearly 3-  
11  
12 279 fold higher risk of developing community-acquired *E. coli* BSI compared to those without  
13  
14 280 asthma, controlling for all potential confounding factors (adjusted OR: 2.74; 95% CI: 1.11-6.76;  
15  
16 281  $p=0.029$ ). The PAR% of asthma by predetermined criteria for asthma in Table 1 for the risk of *E.*  
17  
18 282 *coli* BSI was 9%. The  $p$ -values for testing a significant interaction between asthma and  
19  
20 283 categorized age were as follows:  $p=0.285$  for age cutoff of 65 years (i.e.,  $\geq 65$  vs.  $<65$  years),  
21  
22 284  $p=0.958$  for age cutoff of 40 years (i.e.,  $\geq 40$  vs.  $<40$  years), and  $p=0.417$  for age cutoffs of 40  
23  
24 285 years and 65 years (i.e.,  $<40$ , 40-65, vs.  $>65$  years). As a result, we have no evidence of a  
25  
26 286 differential asthma effect across age strata. Additional characteristics of asthma were also  
27  
28 287 evaluated for an association with risk of community-acquired *E. coli* BSI (see Table 4). Adjusted  
29  
30 288 for other factors, active asthma was associated with increased risk of *E. coli* BSI but for  
31  
32 289 asthmatics on ICS therapy compared to non-asthmatics, but the overall 3-level effect was not  
33  
34 290 statistically significant ( $p=0.079$ ).

#### 291 **Other variables and *E. coli* BSI**

292 Several of the high-risk conditions, as well as non-Caucasian ethnicity, were independently  
293 associated with increased risk of community-acquired *E. coli* BSI (see Tables 2 and 3). A history  
294 of food allergy was found in 16 (6%) of 259 cases as compared with 6 (2%) of 259 controls  
295 (adjusted OR: 3.51; 95% CI: 0.94-13.11;  $p=0.062$ ). Neither allergic rhinitis ( $p=0.82$ ) nor atopic  
296 dermatitis ( $p=0.87$ ) was found to be significantly associated with community-acquired *E. coli*  
297 BSI.



DW Bang et al

298

299

300

301

302

**DISCUSSION**

To our knowledge, this is the first population-based, case-control study that demonstrated an association between asthma and risk of non-respiratory bacterial infection such as community-acquired *E. coli* BSI. This association was independent of other risk factors including age, gender, follow-up duration, ethnicity, educational level, and comorbid conditions (adjusted OR: 2.74; 95% CI: 1.11-6.76; p=0.029). Analyses by different age cut-offs showed that the results were not affected by age effect (e.g., younger vs. older than 40 years of age). Given either the previously-reported non association (hazard ratio, HR: 1.29, 95%CI: 0.53-3.12) or a protective effect (HR: 0.52, 95%CI:0.36-0.76) of ICS therapy on risk of pneumonia in asthmatics(35) and a small number of asthmatics with moderate or high-dose ICS in our study (10 of 53, 19%), we suspect that active or current asthma (or collectively those given ICS therapy) might be related to risk of community-acquired *E. coli* BSI instead of ICS alone. There were only 2 asthmatics on systemic corticosteroid therapy at the time of the index date; therefore, exposure to systemic corticosteroid therapy was unlikely to account for the observed association. We believe that susceptibility bias (e.g., covariate imbalance at baseline) is unlikely to account for the association found in our study given the full adjustment for potential confounders. One concern could be detection bias stemming from a situation where exposure status (asthma status) systematically affects detection of outcomes. However, given *E. coli* BSI as a life-threatening condition, this is

DW Bang et al

1  
2  
3 321 unlikely and also there was no significant difference in symptom duration from BSI-related  
4  
5 322 symptom to index date between asthma and non-asthma in cases ( $4.7 \pm 5.5$  vs  $5.2 \pm 5.5$  days,  
6  
7  
8 323  $p=0.61$ ). Since detection of asthma depends on follow-up duration from registration to index  
9  
10 324 date of community-acquired *E. coli* BSI, we designed our study to ensure that duration was  
11  
12 325 similar between cases and controls. Asthma prevalence in controls in our study was 6%, which is  
13  
14 326 similar to that in adults (7%) in the United States (5.5% for males and 9.7% for females).(36)  
15  
16 327 Also, the prevalence of other common chronic condition such as coronary heart disease in our  
17  
18 328 study (15%) was similar to the national average (7.1% for adults aged 45-64 years and 19.8% for  
19  
20 329 adults aged  $\geq 65$  years) suggesting that our control group may reasonably represent a general  
21  
22 330 population of adults in the United States.(3) There were no significant differences in influenza  
23  
24 331 and PPV23 vaccination rates between cases and controls, which may imply similar access to  
25  
26 332 health care services. Also, food allergy approached to statistical significant association with risk  
27  
28 333 of *E coli* BSI but other atopic conditions were not. This is probably due to greater  
29  
30 334 misclassification bias of ascertainment of allergic rhinitis and atopic dermatitis by ICD-9 code  
31  
32 335 compared to asthma status and food allergy by predetermined criteria in our study. Taken  
33  
34 336 together, our study results suggest that asthma status is independently associated with risk of  
35  
36 337 community-acquired *E. coli* BSI.

338       There are only a few previous studies, which assessed the incidence of *E. coli* BSI and  
339 risk factors associated with its development, including asthma. One study showed a higher risk  
340 of community-acquired *E. coli* BSI in asthmatics compared to non-asthmatics among those over  
341 65 years of age (5.5% vs. 1%).(37) However, another study showed reduced risk of *E. coli* BSI  
342 in asthmatics (rate ratio: 0.3; 95% CI: 0.2-0.4) compared to that in total regional population.(38)  
343 These studies have significant limitations including no *a priori* hypothesis testing on the

DW Bang et al

1  
2  
3 344 relationship between asthma and risk of community-acquired *E. coli* BSI, utilization of  
4  
5 345 administrative data from health care organizations or case reports, ascertainment of *E. coli* BSI  
6  
7  
8 346 cases and asthma based on ICD-9 code, inclusion of only elderly patients aged over 65 years,(37)  
9  
10 347 and no concurrent control group.(38) Thus, our study is the first population-based case-control  
11  
12 348 study that demonstrated a relationship between asthma and risk of community-acquired *E. coli*  
13  
14 349 BSI. Several studies showed increased risks of microbial infections in asthmatics[(5-7, 10, 11)  
15  
16 350 but these studies only addressed the relationship between asthma and airway infections.  
17  
18  
19

20 351 The mechanisms underlying the apparent association between asthma and risk of  
21  
22 352 community-acquired *E. coli* BSI are unknown. Whether previously reported impaired innate  
23  
24 353 immune factors that may predispose to infections due to viruses(13, 39, 40) and other bacteria  
25  
26 354 are operative in community-acquired *E. coli* BSI is undefined. Recently, Habibzay et al reported  
27  
28 355 impaired innate immunity against pneumococci through impaired TLR-receptor signal  
29  
30 356 transduction by house dust mite allergic sensitization resulting in reduced neutrophil recruitment  
31  
32 357 and increased risk of pneumococcal infection in the airways.(11) It is worth investigating  
33  
34 358 whether allergic sensitization can induce similar impairment of innate immunity through TLR-4  
35  
36 359 for gram-negative bacteria in genitourinary or gastrointestinal tracts in asthmatics. Also, an  
37  
38 360 adaptive immune response to gram-negative bacteria might be altered in asthmatics,(41) which  
39  
40 361 may affect susceptibility to gram-negative bacterial infection. For example, Koch et al reported  
41  
42 362 impaired Type 1 helper T cell (Th1) response (interleukin-12-induced interferon- $\gamma$  release from T  
43  
44 363 lymphocytes) to endotoxin from *Salmonella enteritidis* in asthmatics.(42) Further studies are  
45  
46 364 needed to address our study findings.  
47  
48  
49  
50  
51  
52

53 365 The main strengths of our study are a population-based study design and include the  
54  
55 366 epidemiologic merits of self-contained health care environment with comprehensive medical  
56  
57  
58  
59  
60

DW Bang et al

1  
2  
3 367 record system for research. We identified population-based all incident community-acquired *E.*  
4  
5 368 *coli* BSI cases based on the Freidman criteria. We ascertained asthma status by applying  
6  
7  
8 369 predetermined criteria independent of a physician diagnosis of asthma or ICD-9 code. Also, our  
9  
10 370 study has inherent limitations as a retrospective study. We could not obtain detail information on  
11  
12 371 certain variables such as atopic sensitization data or smoking history (e.g., duration or the  
13  
14 372 number of cigarettes a day) but we assumed this data to be missing at random (i.e., it is subject to  
15  
16 373 non-differential misclassification bias for comparison groups of interest). Although our criteria  
17  
18 374 for asthma was based on medical record review, given the absence of gold standard for asthma,  
19  
20 375 the retrospective investigation for feasibility (due to infrequent *E coli* BSI), and the extensive use  
21  
22 376 of the criteria in previous asthma research, we believe the criteria is unlikely to result in a  
23  
24 377 significant bias affecting interpretation of the results. Our study finding that asthma prevalence  
25  
26 378 among controls was similar to that at the national level should mitigate this concern. Our study  
27  
28 379 subjects were predominantly white which might limit generalizability of our results to other  
29  
30 380 ethnic groups. Our study subjects were relatively an older population affected by many  
31  
32 381 comorbid conditions, which might confound the study results. Therefore, we adjusted the  
33  
34 382 association between asthma and risk of *E coli* BSI for each comorbid condition individually in  
35  
36 383 our multivariate model. Since the prevalence of comorbid conditions is related to age, we  
37  
38 384 examined the effect of the interaction between age and asthma. We found that the main results  
39  
40 385 on the association between asthma and risk of *E coli* BSI did not appear to be significantly  
41  
42 386 affected by various cutoffs of age suggesting the results did not differ by age group (younger vs.  
43  
44 387 older group).

DW Bang et al

388 In conclusion, asthmatics might be at an increased risk of non-respiratory tract bacterial  
389 infections, including community-acquired *E. coli* BSI. The mechanisms responsible for this  
390 association are yet to be defined while additional investigations replicate our study findings.

391

### 392 **Acknowledgement**

393 We thank the staff of the Pediatric Asthma Epidemiology Research Unit for their comments and  
394 suggestions. We also thank Elizabeth Krusemark for administrative assistance. This work was  
395 supported by the Clinician Scholarly Award from the Mayo foundation and by the Rochester  
396 Epidemiology Project (R01-AG34676) from the National Institute on Aging. The sponsor of the  
397 study had no role in study design, data collection, data analysis, data interpretation, or writing of  
398 the report.

399

400

401

402

403

404

405

406

407

408

409

410

DW Bang et al

1  
2  
3 411  
4  
5  
6 412  
7  
8 413  
9  
10 414  
11  
12  
13 415  
14  
15 416  
16  
17  
18 417  
19  
20 418  
21  
22 419  
23  
24  
25 420  
26  
27 421  
28 422  
29 423  
30 424  
31 425  
32 426  
33 427  
34 428  
35 429  
36 430  
37 431  
38 432  
39 433  
40 434  
41 435  
42 436  
43 437  
44 438  
45 439  
46 440  
47 441  
48 442  
49 443  
50 444  
51 445  
52 446  
53  
54  
55  
56  
57  
58  
59  
60

## References

1. Eder W, and Ege MJ, and von Mutius E. The Asthma Epidemic. *New England Journal of Medicine*. 2006;355(21 %R doi:10.1056/NEJMra054308):2226-35.
2. Barnett SB, TA. N. Costs of asthma in the United States: 2002-2007. *J Allergy Clin Immunol* 2011;127(1):145-52.
3. The Center for Disease Control and Prevention. Vital signs: asthma prevalence, disease characteristics, and self-management education --- United States, 2001--2009. *MMWR Morb Mortal Wkly Rep*. 2011;60(17):547-52. Epub 2011/05/06.
4. Bernsen RM, van der Wouden JC, Nagelkerke NJ, JC. dj. Early life circumstances and atopic disorders in childhood. *Clinical & Experimental Allergy*. 2006;36(7):858-65.
5. Capili CR, Hettinger A, Rigelman-Hedberg N, Fink L, Boyce T, Lahr B, et al. Increased risk of pertussis in patients with asthma. *J Allergy Clin Immunol*. 2012;129(4):957-63. Epub 2011/12/31.
6. Juhn YJ, Kita H, Yawn BP, Boyce TG, Yoo KH, McGree ME, et al. Increased risk of serious pneumococcal disease in patients with asthma. *Journal of Allergy and Clinical Immunology*. 2008;122(4):719-23.
7. Jung JA, Kita H, Yawn BP, Boyce TG, Yoo KH, McGree ME, et al. Increased risk of serious pneumococcal disease in patients with atopic conditions other than asthma. *J Allergy Clin Immunol*. 2010;125(1):217-21.
8. Klemets P, Lyytikainen O, Ruutu P, Ollgren J, Kaijalainen T, Leinonen M, et al. Risk of invasive pneumococcal infections among working age adults with asthma. *Thorax*. 2010;65(8):698-702. Epub 2010/08/06.
9. Pilishvili T, Zell ER, Farley MM, Schaffner W, Lynfield R, Nyquist AC, et al. Risk factors for invasive pneumococcal disease in children in the era of conjugate vaccine use. *Pediatrics*. 2010;126(1):e9-17.
10. Talbot TR, Hartert TV, Mitchel E, Halasa NB, Arbogast PG, Poehling KA, et al. Asthma as a risk factor for invasive pneumococcal disease. *N Engl J Med*. 2005;352(20):2082-90.

DW Bang et al

11. Habibzay M, Saldana JI, Goulding J, Lloyd CM, Hussell T. Altered regulation of Toll-like receptor responses impairs antibacterial immunity in the allergic lung. *Mucosal Immunol.* 2012;5(5):524-34. Epub 2012/05/03.
12. Jung J, Kita H, Nahm M, Tsigrelis C, Baddour L, Jacobson R, et al. Influence of asthma status on serotype specific antibody pneumococcal antibody levels. *Postgraduate Medicine.* 2010;122(5):116-24.
13. Contoli M, Message SD, Laza-Stanca V, Edwards MR, Wark PA, Bartlett NW, et al. Role of deficient type III interferon-lambda production in asthma exacerbations. *Nat Med.* 2006;12(9):1023-6.
14. Wark PA, Johnston SL, Bucchieri F, Powell R, Puddicombe S, Laza-Stanca V, et al. Asthmatic bronchial epithelial cells have a deficient innate immune response to infection with rhinovirus. *Journal of Experimental Medicine.* 2005;201(6):937-47. Epub 2005/03/23.
15. Message SD, Laza-Stanca V, Mallia P, Parker HL, Zhu J, Kebabdz T, et al. Rhinovirus-induced lower respiratory illness is increased in asthma and related to virus load and Th1/2 cytokine and IL-10 production. *Proc Natl Acad Sci U S A.* 2008;105(36):13562-7. Epub 2008/09/05.
16. Laza-Stanca V, Message SD, Edwards MR, Parker HL, Zdrenghea MT, Kebabdz T, et al. The Role of IL-15 Deficiency in the Pathogenesis of Virus-Induced Asthma Exacerbations. *PLoS Pathog.* 2011;7(7):e1002114.
17. Plummeridge MJ, Armstrong L, Birchall MA, Millar AB. Reduced production of interleukin 12 by interferon  $\gamma$  primed alveolar macrophages from atopic asthmatic subjects. *Thorax.* 2000;55(10):842-7.
18. Ho C-Y, Wong C-K, Ko FW-S, Chan CH-S, Ho AS-S, Hui DS-C, et al. Apoptosis and b-cell lymphoma-2 of peripheral blood t lymphocytes and soluble fas in patients with allergic asthma\*. *CHEST Journal.* 2002;122(5):1751-8.
19. Al-Hasan MN, Lahr BD, Eckel-Passow JE, Baddour LM. Antimicrobial resistance trends of Escherichia coli bloodstream isolates: a population-based study, 1998-2007. *Journal of Antimicrobial Chemotherapy.* 2009;64(1):169-74.
20. Cheong Hs Fau - Kang C-I, Kang Ci Fau - Kwon KT, Kwon Kt Fau - Heo ST, Heo St Fau - Wi YM, Wi Ym Fau - Kim ES, Kim Es Fau - Lee JS, et al. Clinical significance of healthcare-associated infections in community-onset Escherichia coli bacteraemia. (0305-7453 (Print)).
21. St. Sauver JL, Grossardt BR, Yawn BP, Melton LJ, Rocca WA. Use of a Medical Records Linkage System to Enumerate a Dynamic Population Over Time: The Rochester Epidemiology Project. *American Journal of Epidemiology.* 2011;173(9):1059-68.
22. Kurland LT, Molgaard CA. The patient record in epidemiology. *Sci Am.* 1981;245(4):54-63. Epub 1981/10/01.
23. Broder I, Higgins MW, Mathews KP, Keller JB. Epidemiology of asthma and allergic rhinitis in a total community, Tecumseh, Michigan: III. Second survey of the community. *J Allergy Clin Immunol.* 1974;53(3):127-38.
24. Friedman ND, Kaye KS, Stout JE, McGarry SA, Trivette SL, Briggs JP, et al. Health care--associated bloodstream infections in adults: a reason to change the accepted definition of community-acquired infections. *Ann Intern Med.* 2002;137(10):791-7.
25. Yunginger JW, Reed CE, O'Connell EJ, Melton LJ, 3rd, O'Fallon WM, Silverstein MD. A community-based study of the epidemiology of asthma. Incidence rates, 1964-1983. *Am Rev Respir Dis.* 1992;146(4):888-94. Epub 1992/10/01.



DW Bang et al

- 1  
2  
3 493 26. Silverstein MD, Reed CE, O'Connell EJ, Melton LJ, 3rd, O'Fallon WM, Yunginger JW.  
4 494 Long-term survival of a cohort of community residents with asthma. *N Engl J Med*.  
5 495 1994;331(23):1537-41. Epub 1994/12/08.  
6  
7 496 27. Bauer BA, Reed CE, Yunginger JW, Wollan PC, Silverstein MD. Incidence and  
8 497 outcomes of asthma in the elderly. A population-based study in Rochester, Minnesota.  
9 498 *Chest*. 1997;111(2):303-10. Epub 1997/02/01.  
10  
11 499 28. Juhn YJ, Qin R, Urm S, Katusic S, Vargas-Chanes D. The influence of neighborhood  
12 500 environment on the incidence of childhood asthma: a propensity score approach. *J Allergy*  
13 501 *Clin Immunol*. 2010;125(4):838-43 e2. Epub 2010/03/20.  
14 502 29. Juhn YJ, Sauver JS, Katusic S, Vargas D, Weaver A, Yunginger J. The influence of  
15 503 neighborhood environment on the incidence of childhood asthma: a multilevel approach.  
16 504 *Social science & medicine*. 2005;60(11):2453-64. Epub 2005/04/09.  
17  
18 505 30. Yawn BP, Yunginger JW, Wollan PC, Reed CE, Silverstein MD, Harris AG. Allergic  
19 506 rhinitis in Rochester, Minnesota residents with asthma: frequency and impact on health  
20 507 care charges. *J Allergy Clin Immunol*. 1999;103(1 Pt 1):54-9. Epub 1999/01/20.  
21 508 31. Yunginger J, Reed, CE, O'Connell, EJ, Melton, J, O'Fallon, WM, Silverstein, MD. A  
22 509 Community-based Study of the Epidemiology of Asthma: Incidence Rates, 1964-1983. *Am*  
23 510 *Rev Respir Dis*. 1992;146:888-94.  
24  
25 511 32. Javed A, Yoo KH, Jacobson RM, Poland GA, Juhn YJ. Characteristics of Children with  
26 512 Asthma who Achieved Remission of Asthma. *Journal of Asthma*. 2013;Epub ahead of  
27 513 print(doi:10.3109/02770903.2013.787625).  
28  
29 514 33. Greenland S. Modeling and variable selection in epidemiologic analysis. *Am J Public*  
30 515 *Health*. 1989;79:340-9.  
31 516 34. Miettinen OS. Proportion of disease caused or prevented by a given exposure, trait  
32 517 or intervention. *American Journal of Epidemiology*. 1974;99(5):325-32.  
33  
34 518 35. O'Byrne PM, Pedersen S, Carlsson L-G, Radner F, Thoren A, Peterson S, et al. Risks of  
35 519 Pneumonia in Patients with Asthma Taking Inhaled Corticosteroids. *Am J Respir Crit Care*  
36 520 *Med*. 2011;183(5):589-95.  
37 521 36. The Center for Disease Control and Prevention. Prevalence of Coronary Heart  
38 522 Disease: United States, 2006-2010. *MMWR*. 2011;60(40):1377-81.  
39  
40 523 37. Jackson LA, Benson P, Neuzil KM, Grandjean M, Marino JL. Burden of community-  
41 524 onset *Escherichia coli* bacteremia in seniors. *J Infect Dis*. 2005;191(9):1523-9.  
42 525 38. Laupland KB GD, Church DL, Ross T, Pitout JD,. Incidence, Risk Factors and  
43 526 Outcomes of *Escherichia coli* Blood Stream Infections in a Large Canadian Region. *Clin*  
44 527 *Microbiol Infect*. 2008;14:1041-7.  
45 528 39. Sykes A, Edwards MR, Macintyre J, Del Rosario A, Bakhsoliani E, Trujillo-Torralbo  
46 529 MB, et al. Rhinovirus 16-induced IFN-alpha and IFN-beta are deficient in bronchoalveolar  
47 530 lavage cells in asthmatic patients. *J Allergy Clin Immunol*.129(6):1506-14 e6.  
48 531 40. Wang L, Zhao L, Lv J, Yin Q, Liang X, Chu Y, et al. BLT1-dependent Alveolar  
49 532 Recruitment of CD4+CD25+ Foxp3+ Regulatory T Cells Is Important for Resolution of Acute  
50 533 Lung Injury. *Am J Respir Crit Care Med*. 2012;186(10):989-98.  
51  
52 534 41. Robinson DS. Regulatory T cells and asthma. *Clin Exp Allergy*. 2009;39(9):1314-23.  
53 535 42. Koch A, Knobloch J, Dammhayn C, Raidl M, Ruppert A, Hag H, et al. Effect of bacterial  
54 536 endotoxin LPS on expression of INF-gamma and IL-5 in T-lymphocytes from asthmatics.  
55 537 *Clin Immunol*. 2007;125(2):194-204. Epub 2007/09/22.  
56  
57 538  
58  
59  
60



DW Bang et al

539

540

541

542

543

544

545

546

547

Table 1. Definition of asthma

Patients were considered to have *definite* asthma if a physician had made a diagnosis of asthma with the first two conditions and/or if each of the following three conditions were present, and they were considered to have *probable* asthma if only the first two conditions were present:

1. History of cough with wheezing, and/or dyspnea, OR history of cough and/or dyspnea plus wheezing on examination,
2. Substantial variability in symptoms from time to time or periods of weeks or more when symptoms were absent, and
3. Two or more of the following:
  - Sleep disturbance by nocturnal cough and wheeze
  - Nonsmoker (14 years or older)
  - Nasal polyps
  - Blood eosinophilia higher than 300/uL
  - Positive wheal and flare skin tests OR elevated serum IgE
  - History of hay fever or infantile eczema OR cough, dyspnea, and wheezing regularly on exposure to an antigen
  - Pulmonary function tests showing one FEV<sub>1</sub> or FVC less than 70% predicted and another with at least 20% improvement to an FEV<sub>1</sub> of higher 70% predicted OR methacholine challenge test showing 20% or greater decrease in FEV<sub>1</sub>
  - Favorable clinical response to bronchodilator (e.g., documented improvement of respiratory symptoms or FEV<sub>1</sub> in spirometry after bronchodilator therapy)

Patients were excluded from the study if any of these conditions were present:

- Tracheobronchial foreign body at or about the incidence date
  - Hypogammaglobulinemia (IgG less than 2.0 mg/mL) or other immunodeficiency disorder
  - Wheezing occurring only in response to anesthesia or medications
  - Bullous emphysema or pulmonary fibrosis on chest radiograph
  - PiZZ alpha<sub>1</sub>-antitrypsin
  - Cystic fibrosis
  - Other major chest disease such as juvenile kyphoscoliosis or bronchiectasis
- FVC forced vital capacity; FEV<sub>1</sub>, forced expiratory volume in 1 sec.

DW Bang et al

- 
- Pulmonary function tests that showed FEV<sub>1</sub> to be consistently below 50% predicted or diminished diffusion capacity

For peer review only

---

548  
549  
550  
551  
552  
553  
554  
555  
556  
557

Table 2. Sociodemographic, and clinical characteristics of patients with *Escherichia coli* blood stream infection and their matched control subjects

DW Bang et al

| Characteristics                                  | Case<br>(n= 259) | Control<br>(n= 259) | Unadjusted OR <sup>a</sup><br>(95% CI) | p value |
|--------------------------------------------------|------------------|---------------------|----------------------------------------|---------|
| Age (years)                                      | 61±22            | 61±22               | 1.14 (0.78, 1.67)                      | 0.497   |
| Female gender                                    | 179 (69%)        | 179 (69%)           | -                                      |         |
| Ethnicity                                        |                  |                     |                                        | <0.001  |
| Caucasian (non-Hispanic)                         | 222 (86%)        | 245 (95%)           | Referent                               |         |
| Other                                            | 37 (14%)         | 14 (5%)             | 4.83 (2.01, 11.64)                     |         |
| Education status                                 |                  |                     |                                        | 0.004   |
| Some high school or less                         | 45 (17%)         | 21 (8%)             | Referent                               |         |
| High school graduate                             | 95 (37%)         | 87 (34%)            | 0.50 (0.27, 0.93)                      |         |
| Some college or more                             | 110 (42%)        | 143 (55%)           | 0.33 (0.18, 0.62)                      |         |
| Unknown                                          | 9 (3%)           | 8 (3%)              | -                                      |         |
| Influenza vaccination 1 year prior to index date | 95 (37%)         | 110 (42%)           | 0.75 (0.51, 1.10)                      | 0.145   |
| PPV23 prior to index date                        | 117 (45%)        | 114 (44%)           | 1.08 (0.69, 1.68)                      | 0.736   |
| Food allergy                                     | 16 (6%)          | 6 (2%)              | 2.67 (1.04, 6.81)                      | 0.040   |
| Asthma                                           | 37 (14%)         | 16 (6%)             | 2.75 (1.42, 5.32)                      | 0.003   |
| High-risk conditions                             |                  |                     |                                        |         |
| Alcohol addiction                                | 17 (7%)          | 1 (0%)              | 17.00 (2.26, 127.75)                   | 0.006   |
| Autoimmune disease <sup>c</sup>                  | 9 (3%)           | 3 (1%)              | 3.00 (0.81, 11.08)                     | 0.099   |
| Chronic obstructive lung disease                 | 12 (5%)          | 9 (3%)              | 1.37 (0.55, 3.42)                      | 0.493   |
| Chronic renal insufficiency                      | 30 (12%)         | 4 (2%)              | 9.67 (2.94, 31.73)                     | <0.001  |
| Congestive heart failure                         | 19 (7%)          | 2 (1%)              | 18.00 (2.40, 134.84)                   | 0.005   |
| Coronary artery disease                          | 52 (20%)         | 40 (15%)            | 1.46 (0.89, 2.41)                      | 0.136   |
| Dementia                                         | 16 (6%)          | 7 (3%)              | 3.25 (1.06, 9.97)                      | 0.039   |
| Diabetes mellitus                                | 50 (19%)         | 24 (9%)             | 2.53 (1.44, 4.43)                      | 0.001   |
| History of stroke                                | 15 (6%)          | 10 (4%)             | 1.71 (0.67, 4.35)                      | 0.257   |
| Immobilization <sup>d</sup>                      | 10 (4%)          | 1 (0%)              | 10.00 (1.28, 78.12)                    | 0.028   |
| Immunosuppressive therapy                        | 25 (10%)         | 4 (2%)              | 8.00 (2.41, 26.57)                     | 0.001   |
| Malignancy                                       | 21 (8%)          | 12 (5%)             | 2.00 (0.90, 4.45)                      | 0.090   |
| Recurrent urinary tract infection                | 29 (11%)         | 2 (1%)              | 14.50 (3.46, 60.77)                    | <0.001  |
| Transplant recipients                            | 8(3%)            | 0 (0%)              | -                                      |         |
| Urinary incontinence                             | 46 (18%)         | 20 (8%)             | 2.86 (1.55, 5.25)                      | 0.001   |
| Other condition <sup>e</sup>                     | 14 (5%)          | 0 (0%)              | -                                      | -       |
| Smoke                                            |                  |                     |                                        | 0.058   |
| No (including ex-smoker)                         | 206 (80%)        | 222 (86%)           | Referent                               |         |

DW Bang et al

Active 53 (20%) 37 (14%) 1.59 (0.98, 2.58)

<sup>a</sup> Odds ratio based on matched analysis taking into account gender, birthday, residency, and follow-up duration

<sup>b</sup> Comorbidity conditions are not mutually exclusive

<sup>c</sup> Autoimmune disease includes SLE, rheumatoid arthritis, inflammatory bowel disease and other autoimmune diseases

<sup>d</sup> Immobilization includes hemi/para/quadri-plegia

<sup>e</sup> Other conditions include use of urinary catheter, device, genitourinary procedures (e.g., prostate biopsy), and congenital anomaly

For peer review only

Table 3. A multivariable conditional logistic regression model for the association between asthma and risk of community-acquired *Escherichia coli* bloodstream infection

| Characteristics | Case<br>(n= 259) | Control<br>(n= 259) | Adjusted OR <sup>a</sup> (95% CI) | p value |
|-----------------|------------------|---------------------|-----------------------------------|---------|
|-----------------|------------------|---------------------|-----------------------------------|---------|

DW Bang et al

|                                                  |           |           |                      |       |
|--------------------------------------------------|-----------|-----------|----------------------|-------|
| Ethnicity                                        |           |           |                      | 0.003 |
| Caucasian (non-Hispanic)                         | 222 (86%) | 245 (95%) | Referent             |       |
| Other                                            | 37 (14%)  | 14 (5%)   | 5.90 (1.85, 18.84)   |       |
| Education status                                 |           |           |                      | 0.646 |
| Some high school or less                         | 45 (17%)  | 21 (8%)   | Referent             |       |
| High school graduate                             | 95 (37%)  | 87 (34%)  | 0.89 (0.37, 2.14)    |       |
| Some college or more                             | 110 (42%) | 143 (55%) | 0.65 (0.28, 1.50)    |       |
| Unknown                                          | 9 (3%)    | 8 (3%)    | -                    |       |
| Influenza vaccination 1 year prior to index date | 95 (37%)  | 110 (42%) | 0.58 (0.33, 1.02)    | 0.058 |
| Food allergy                                     | 16 (6%)   | 6 (2%)    | 3.51 (0.94, 13.11)   | 0.062 |
| Asthma                                           | 37 (14%)  | 16 (6%)   | 2.74 (1.11, 6.76)    | 0.029 |
| Active smoking                                   | 53 (20%)  | 37 (14%)  | 1.31 (0.69, 2.47)    | 0.412 |
| High-risk conditions                             |           |           |                      |       |
| Alcohol addiction                                | 17 (7%)   | 1 (0%)    | 32.31 (1.91, 546.18) | 0.016 |
| Autoimmune diseases                              | 9 (3%)    | 3 (1%)    | 1.79 (0.23, 13.72)   | 0.574 |
| Chronic renal insufficiency                      | 30 (12%)  | 4 (2%)    | 4.76 (1.16, 19.59)   | 0.030 |
| Congestive heart failure                         | 19 (7%)   | 2 (1%)    | 9.86 (0.93, 104.59)  | 0.058 |
| Coronary artery disease                          | 52 (20%)  | 40 (15%)  | 0.81 (0.37, 1.77)    | 0.593 |
| Dementia                                         | 16 (6%)   | 7 (3%)    | 4.14 (0.96, 17.96)   | 0.057 |
| Diabetes mellitus                                | 50 (19%)  | 24 (9%)   | 2.39 (0.97, 5.87)    | 0.057 |
| Immobilization                                   | 10 (4%)   | 1 (0%)    | 39.86 (2.30, 690.42) | 0.011 |
| Immunosuppressive therapy                        | 25 (10%)  | 4 (2%)    | 8.51 (1.32, 54.96)   | 0.024 |
| Malignancy                                       | 21 (8%)   | 12 (5%)   | 2.18 (0.59, 8.11)    | 0.243 |
| Recurrent urinary tract infection                | 29 (11%)  | 2 (1%)    | 13.54 (2.42, 75.65)  | 0.003 |
| Urinary incontinence                             | 46 (18%)  | 20 (8%)   | 2.57 (1.05, 6.26)    | 0.038 |

<sup>a</sup> Adjusted variables included all variables included in this table.

Table 4. Association of asthma control status and therapy with risk of community-acquired *Escherichia coli* bloodstream infection

| Asthma characteristics | Total | Unadjusted OR | Adjusted OR <sup>a</sup> |
|------------------------|-------|---------------|--------------------------|
|------------------------|-------|---------------|--------------------------|

DW Bang et al

|                                      | (n=518)   | (95% CI), p-value  | (95% CI), p-value  |
|--------------------------------------|-----------|--------------------|--------------------|
| Inhaled corticosteroid therapy (ICS) |           | $p=0.009^b$        | $p=0.079^b$        |
| No asthma                            | 465 (90%) | Referent           | Referent           |
| Asthma without ICS                   | 35 (7%)   | 1.90 (0.88, 4.09)  | 1.99 (0.67, 5.94)  |
| Asthma with ICS                      | 18 (3%)   | 7.00 (1.59, 30.80) | 5.33 (0.90, 31.66) |
| Asthma status <sup>c</sup>           |           | $p=0.005^b$        | $p=0.067^b$        |
| No asthma                            | 465 (90%) | Referent           | Referent           |
| Remission or inactive asthma         | 17 (3%)   | 1.25 (0.45, 3.50)  | 1.25 (0.25, 6.30)  |
| Active or current asthma             | 36 (7%)   | 4.37 (1.80, 10.62) | 3.89 (1.23, 12.28) |

<sup>a</sup> Adjusted variables included all factors reported in the multivariable model (see Table 3) except for dichotomous asthma status

<sup>b</sup> P-value for overall comparison

<sup>c</sup> Active or current asthma was defined as the presence of asthma-related events including asthma symptoms, or use of asthma medications, and outpatient/emergency department/hospitalization for asthma within one year prior to index date of E coli BSI; Remission of asthma was defined as the absence of asthma-related events > 3 years prior to index date; Inactive (not current) asthma was defined as the presence of asthma-related events within 1-3 years prior to index date.
